# Supplementary material for: Dual DNA Methylation Patterns in the CNS Reveal Developmentally Poised Chromatin and Monoallelic Expression of Critical Genes
Source: PLoS One. 2010 Nov 4;5(11):e13843. doi: 10.1371/journal.pone.0013843 (PMC2973945; doi:10.1371/journal.pone.0013843)
Supplement: Dataset S3 — Expression pattern and description of MAUD hits. (0.40 MB XLS) [file pone.0013843.s009.xls]

## Sheet: Sheet1
Dataset S3. Expression pattern and description of MAUD hits.
Entrez GeneIDs, chromosome locations, gene symbols and descriptions are from NCBI mouse build 36 (Mm8), based on Nimblegen annotation.
The expression pattern is based on the GNF Mouse Gene Expression Atlas. The column "tissue-specific expression" shows the ratio of the level
of expression in the highest expressing tissue to the median expression for all tissues. The corresponding high-expressing tissue, and the
tissue-specific values for cerebral cortex are shown as indicated.
Asterisks in the "Bivalent in ES cells" column denote the subset of MAUD hits with histone modifications H3K4Me2/3 and H3K27Me3 in mouse ES cells
(Mikkelsen, et al., 2007).
GeneID	Chr	Gene Symbol	Bivalent		Expression		Description
			in ES cells	Tissue-Specific	Specific Tissue	Cerebral Cortex
66839	chr18	0610009O20Rik		5.9	heart	0.94	RIKEN cDNA 0610009O20 gene
104457	chr11	0610010K14Rik		3.2	blastocysts	0.86	RIKEN cDNA 0610010K14 gene
68352	chr07	0610012D14Rik		36.5	liver	0.89	RIKEN cDNA 0610012D14 gene
67441	chr07	0610042E07Rik		1.5	kidney	0.99	RIKEN cDNA 0610042E07 gene
66096	chr05	0910001L09Rik		2.3	kidney	0.83	RIKEN cDNA 0910001L09 gene
66107	chr11	1100001G20Rik		44.2	liver	0.84	RIKEN cDNA 1100001G20 gene
68487	chr06	1110007F12Rik		2.2	placenta	0.97	RIKEN cDNA 1110007F12 gene
68617	chr17	1110012J17Rik		19.8	cerebellum	3.26	RIKEN cDNA 1110012J17 gene
68497	chr12	1110018G07Rik		15.3	oocyte	6.69	RIKEN cDNA 1110018G07 gene
68584	chr14	1110020C17Rik		1.3	liver	0.97	RIKEN cDNA 1110020C17 gene
68764	chr12	1110049B09Rik		16.4	trachea	0.96	RIKEN cDNA 1110049B09 gene
76974	chr07	1190003J15Rik		61.2	liver	0.89	RIKEN cDNA 1190003J15 gene
68888	chr06	1190003M12Rik		177.9	stomach	1.45	RIKEN cDNA 1190003M12 gene
74190	chr12	1200009I06Rik	*	65.2	small intestine	0.97	RIKEN cDNA 1200009I06 gene
74763	chr16	1200013P24Rik		2.3	B220+ B-cells	1.5	RIKEN cDNA 1200013P24 gene
67808	chr04	1200015A19Rik		2.3	dorsal root ganglia	1.01	RIKEN cDNA 1200015A19 gene
71774	chr11	1300007L22Rik		2.2	mammary gland (lact)	0.88	RIKEN cDNA 1300007L22 gene
219189	chr14	1300010F03Rik		6.1	brown fat	0.98	RIKEN cDNA 1300010F03 gene
66895	chr13	1300014I06Rik	*	8	lung	0.85	RIKEN cDNA 1300014I06 gene
72014	chr11	1500005I02Rik	*	2	pancreas	0.97	RIKEN cDNA 1500005I02 gene
76505	chr15	1500009C09Rik		22.8	substantia nigra	16.1	RIKEN cDNA 1500009C09 gene
68954	chr07	1500012K07Rik					RIKEN cDNA 1500012K07 gene
68209	chr19	1500026D16Rik		6.5	B220+ B-cells	0.94	RIKEN cDNA 1500026D16 gene
214305	chr12	1600002O04Rik	*	2.1	placenta	0.94	RIKEN cDNA 1600002O04 gene
71995	chr02	1600014E20Rik		162.5	placenta	0.98	RIKEN cDNA 1600014E20 gene
66323	chr12	1700001K19Rik		28.9	testis	0.85	RIKEN cDNA 1700001K19 gene
73598	chr02	1700001O22Rik	*	125.4	testis	0.98	RIKEN cDNA 1700001O22 gene
75784	chr05	1700007G11Rik		119.9	testis	0.97	RIKEN cDNA 1700007G11 gene
75188	chr10	1700009J07Rik		119.3	testis	0.98	RIKEN cDNA 1700009J07 gene
66931	chr17	1700010I14Rik		224.4	testis	0.97	RIKEN cDNA 1700010I14 gene
75467	chr17	1700011E24Rik		56.2	testis	0.98	RIKEN cDNA 1700011E24 gene
75645	chr19	1700011F14Rik		6.5	testis	0.92	RIKEN cDNA 1700011F14 gene
76382	chr06	1700012A03Rik		334.8	testis	0.98	RIKEN cDNA 1700012A03 gene
69324	chr11	1700012B07Rik		2.6	prostate	1.04	RIKEN cDNA 1700012B07 gene
74224	chr13	1700014D04Rik		3.5	testis	0.95	RIKEN cDNA 1700014D04 gene
69428	chr01	1700016C15Rik		147.2	testis	0.91	RIKEN cDNA 1700016C15 gene
65971	chr10	1700021K02Rik	*	47.2	thymus	1.06	RIKEN cDNA 1700021K02 gene
69441	chr11	1700023F06Rik		39	testis	0.92	RIKEN cDNA 1700023F06 gene
75531	chr16	1700025H01Rik		1.3	liver	0.97	RIKEN cDNA 1700025H01 gene
69453	chr01	1700027L20Rik		14.7	testis	1.09	RIKEN cDNA 1700027L20 gene
73344	chr06	1700034J05Rik					RIKEN cDNA 1700034J05 gene
73259	chr05	1700041E20Rik		1.7	testis	0.99	RIKEN cDNA 1700041E20 gene
73382	chr14	1700049K14Rik		80.1	testis	0.98	RIKEN cDNA 1700049K14 gene
73453	chr08	1700067K01Rik		65.4	testis	0.98	RIKEN cDNA 1700067K01 gene
68224	chr17	1700067P10Rik		63.3	testis	0.98	RIKEN cDNA 1700067P10 gene
74282	chr11	1700086D15Rik		1.7	blastocysts	1.19	RIKEN cDNA 1700086D15 gene
27660	chr15	1700088E04Rik					RIKEN cDNA 1700088E04 gene
74296	chr16	1700093J21Rik		1.4	dorsal striatum	0.99	RIKEN cDNA 1700093J21 gene
76633	chr14	1700112E06Rik		2.6	brown fat	0.96	RIKEN cDNA 1700112E06 gene
76646	chr02	1700123D08Rik		1.3	medial olfactory epithelium	0.98	RIKEN cDNA 1700123D08 gene
76658	chr05	1700123K08Rik		2	testis	0.9	RIKEN cDNA 1700123K08 gene
67932	chr14	1700129C05Rik		189.3	testis	0.97	RIKEN cDNA 1700129C05 gene
69036	chr07	1810010M01Rik		3672.3	pancreas	0.95	RIKEN cDNA 1810010M01 gene
69187	chr06	1810033M07Rik		112.7	pancreas	0.99	RIKEN cDNA 1810033M07 gene
67622	chr11	1810057P16Rik		3.2	retina	0.91	RIKEN cDNA 1810057P16 gene
75597	chr13	1810058I14Rik		2.7	testis	0.91	RIKEN cDNA 1810058I14 gene
69862	chr09	1810064F22Rik					RIKEN cDNA 1810064F22 gene
69864	chr11	1810065E05Rik		944.3	large intestine	0.97	RIKEN cDNA 1810065E05 gene
69865	chr19	1810073H04Rik		2.4	brown fat	0.96	RIKEN cDNA 1810073H04 gene
72046	chr11	2010005J08Rik		1.8	pancreas	1.01	RIKEN cDNA 2010005J08 gene
66298	chr08	2010016B13Rik		435.3	small intestine	0.98	RIKEN cDNA 2010016B13 gene
72097	chr01	2010300C02Rik		22.9	hippocampus	20.85	RIKEN cDNA 2010300C02 gene
69137	chr09	2200002K05Rik		25	dorsal root ganglia	0.98	RIKEN cDNA 2200002K05 gene
72357	chr05	2210016L21Rik		9.6	preoptic	5.47	RIKEN cDNA 2210016L21 gene
76708	chr02	2210022J03Rik		1.9	salivary gland	0.96	RIKEN cDNA 2210022J03 gene
75690	chr07	2210412E05Rik		20.9	tongue	0.93	RIKEN cDNA 2210412E05 gene
108956	chr15	2210421G13Rik		234	lymphnode	0.88	RIKEN cDNA 2210421G13 gene
74175	chr03	2300002G24Rik		1041.5	tongue	0.94	RIKEN cDNA 2300002G24 gene
71881	chr02	2310001A20Rik		16	vomeralnasal organ	1.3	RIKEN cDNA 2310001A20 gene
74248	chr05	2310003L06Rik		138.4	medial olfactory epithelium	0.94	RIKEN cDNA 2310003L06 gene
66939	chr09	2310007F21Rik		2.3	thymus	0.9	RIKEN cDNA 2310007F21 gene
72309	chr09	2310037P21Rik		5.5	dorsal striatum	1.24	RIKEN cDNA 2310037P21 gene
69666	chr13	2310047M15Rik		4.8	B220+ B-cells	0.76	RIKEN cDNA 2310047M15 gene
78890	chr05	2310079F23Rik		5.2	blastocysts	1.04	RIKEN cDNA 2310079F23 gene
69211	chr13	2310081J21Rik					RIKEN cDNA 2310081J21 gene
66405	chr02	2400002F11Rik		9.5	testis	0.92	RIKEN cDNA 2400002F11 gene
77006	chr02	2600009E05Rik		1.6	embryo day 10.5	1.09	RIKEN cDNA 2600009E05 gene
72125	chr14	2600011E07Rik	*	7.4	cerebellum	1.56	RIKEN cDNA 2600011E07 gene
67513	chr04	2610002J02Rik		7.9	cerebellum	0.95	RIKEN cDNA 2610002J02 gene
66300	chr07	2610014I16Rik		3.4	snout epidermis	1.12	RIKEN cDNA 2610014I16 gene
72512	chr18	2610307O08Rik		2.9	lymphnode	0.98	RIKEN cDNA 2610307O08 gene
74206	chr07	2610511M17Rik		4.3	hippocampus	1.6	RIKEN cDNA 2610511M17 gene
66494	chr13	2610524G07Rik					RIKEN cDNA 2610524G07 gene
212772	chr02	2700007P21Rik		5.1	medial olfactory epithelium	1.32	RIKEN cDNA 2700007P21 gene
78449	chr18	2700046A07Rik		1.5	pancreas	0.96	RIKEN cDNA 2700046A07 gene
214764	chr07	2700050L05Rik		8.9	oocyte	1.03	RIKEN cDNA 2700050L05 gene
78833	chr08	2700085M18Rik		2.2	oocyte	0.94	RIKEN cDNA 2700085M18 gene
72657	chr02	2700094K13Rik		1.6	stomach	1.34	RIKEN cDNA 2700094K13 gene
69953	chr01	2810025M15Rik		15.5	testis	1.11	RIKEN cDNA 2810025M15 gene
72669	chr12	2810032G03Rik		2	thyroid	1.19	RIKEN cDNA 2810032G03 gene
72716	chr07	2810047C21Rik		4.1	digits	0.77	RIKEN cDNA 2810047C21 gene
72168	chr16	2810401C16Rik		5.7	cerebellum	2.09	RIKEN cDNA 2810401C16 gene
70211	chr16	2810407A14Rik		2.9	brown fat	1.01	RIKEN cDNA 2810407A14 gene
69962	chr01	2810422O20Rik		4.1	B220+ B-cells	0.85	RIKEN cDNA 2810422O20 gene
69961	chr04	2810432D09Rik		3.5	fertilized egg	0.91	RIKEN cDNA 2810432D09 gene
72927	chr09	2900042E01Rik		7.5	substantia nigra	3.47	RIKEN cDNA 2900042E01 gene
108937	chr07	2900057K09Rik		3.4	thymus	1.42	RIKEN cDNA 2900057K09 gene
68205	chr02	2900073H19Rik		1.4	lymphnode	1.02	RIKEN cDNA 2900073H19 gene
75429	chr11	3100002J23Rik		146.6	pituitary	0.95	RIKEN cDNA 3100002J23 gene
70354	chr02	3110001I20Rik		6.7	trigeminal	1.58	RIKEN cDNA 3110001I20 gene
75698	chr14	3110001K24Rik		2.3	liver	0.94	RIKEN cDNA 3110001K24 gene
73103	chr01	3110009E18Rik		1.5	pancreas	0.98	RIKEN cDNA 3110009E18 gene
73205	chr04	3110043O21Rik		11.3	dorsal root ganglia	0.92	RIKEN cDNA 3110043O21 gene
67302	chr14	3110050K21Rik		3.5	oocyte	1.06	RIKEN cDNA 3110050K21 gene
73218	chr10	3110056O03Rik		10.3	testis	1.32	RIKEN cDNA 3110056O03 gene
75430	chr07	3200002M19Rik		4	oocyte	0.94	RIKEN cDNA 3200002M19 gene
71823	chr12	3300002A11Rik		2.4	trachea	0.91	RIKEN cDNA 3300002A11 gene
78512	chr17	3300005D01Rik		3.1	umbilical cord	0.94	RIKEN cDNA 3300005D01 gene
432836	chr14	3425401B19Rik					RIKEN cDNA 3425401B19 gene
78252	chr09	4432416J03Rik		28.9	bonemarrow	0.89	RIKEN cDNA 4432416J03 gene
78749	chr16	4631422O05Rik		34.4	B220+ B-cells	0.44	RIKEN cDNA 4631422O05 gene
74340	chr06	4631427C17Rik					RIKEN cDNA 4631427C17 gene
78748	chr07	4632411J06Rik	*	1.6	thyroid	0.97	RIKEN cDNA 4632411J06 gene
245843	chr16	4632417D23Rik	*	16.4	lung	0.71	RIKEN cDNA 4632417D23 gene
74048	chr10	4632428N05Rik	*	15.7	CD8+T-cells	1.15	RIKEN cDNA 4632428N05 gene
100342	chr04	4732473B16Rik		59.6	oocyte	0.95	RIKEN cDNA 4732473B16 gene
237353	chr10	4831416G18Rik		1.5	bonemarrow	0.96	RIKEN cDNA 4831416G18 gene
76862	chr12	4833405L11Rik		1.5	pancreas	1.02	RIKEN cDNA 4833405L11 gene
235345	chr09	4833427G06Rik		24.6	testis	0.94	RIKEN cDNA 4833427G06 gene
70846	chr12	4921506M07Rik		15.5	testis	0.97	RIKEN cDNA 4921506M07 gene
70897	chr12	4921509E07Rik		111.7	testis	0.94	RIKEN cDNA 4921509E07 gene
232664	chr06	4921511K06Rik		151	testis	11.22	RIKEN cDNA 4921511K06 gene
70902	chr05	4921521K07Rik		2.1	stomach	0.96	RIKEN cDNA 4921521K07 gene
70954	chr08	4922502B01Rik		1.6	liver	0.98	RIKEN cDNA 4922502B01 gene
74854	chr02	4930402F06Rik		1.2	bonemarrow	0.98	RIKEN cDNA 4930402F06 gene
195712	chr05	4930421P07Rik					RIKEN cDNA 4930421P07 gene
208718	chr01	4930429A22Rik		1.7	B220+ B-cells	1.04	RIKEN cDNA 4930429A22 gene
78154	chr05	4930430O22Rik		1.2	bonemarrow	0.98	RIKEN cDNA 4930430O22 gene
76872	chr16	4930432J16Rik		62.7	testis	0.88	RIKEN cDNA 4930432J16 gene
114673	chr09	4930433N12Rik		4.1	spleen	0.9	RIKEN cDNA 4930433N12 gene
74892	chr15	4930447A16Rik		1.6	bonemarrow	0.96	RIKEN cDNA 4930447A16 gene
78244	chr15	4930461P20Rik		7.2	oocyte	0.85	RIKEN cDNA 4930461P20 gene
75804	chr10	4930463O16Rik		4	testis	0.92	RIKEN cDNA 4930463O16 gene
78802	chr02	4930506L13Rik		1.3	liver	0.97	RIKEN cDNA 4930506L13 gene
108970	chr09	4930519F24Rik					RIKEN cDNA 4930519F24 gene
277496	chr02	4930526D03Rik	*	232.4	testis	0.98	RIKEN cDNA 4930526D03 gene
75207	chr07	4930533L02Rik		1.4	pituitary	1.05	RIKEN cDNA 4930533L02 gene
207819	chr17	4930539E08Rik		46.9	large intestine	1.68	RIKEN cDNA 4930539E08 gene
78807	chr07	4930544L04Rik		1.3	cerebral cortex	1.25	RIKEN cDNA 4930544L04 gene
75161	chr13	4930544M13Rik		1.5	fertilized egg	0.97	RIKEN cDNA 4930544M13 gene
68274	chr04	4930547C10Rik		40	testis	0.93	RIKEN cDNA 4930547C10 gene
75299	chr10	4930547M16Rik					RIKEN cDNA 4930547M16 gene
75300	chr13	4930548F15Rik		1.7	thyroid	0.98	RIKEN cDNA 4930548F15 gene
67739	chr15	4930570C03Rik		7.2	substantia nigra	3.8	RIKEN cDNA 4930570C03 gene
75860	chr05	4930588N13Rik		11.3	testis	0.87	RIKEN cDNA 4930588N13 gene
75906	chr10	4930589M24Rik	*	5.8	olfactory bulb	1.21	RIKEN cDNA 4930589M24 gene
75385	chr03	4930597L12Rik		1.3	embryo day 10.5	0.98	RIKEN cDNA 4930597L12 gene
77592	chr14	4931406H21Rik		2.3	pancreas	0.92	RIKEN cDNA 4931406H21 gene
70967	chr16	4931408A02Rik	*	1.3	pancreas	0.98	RIKEN cDNA 4931408A02 gene
234353	chr08	4931420C21Rik		15.1	amygdala	6.58	RIKEN cDNA 4931420C21 gene
442809	chr08	4932416K20Rik		10.5	testis	0.97	RIKEN cDNA 4932416K20 gene
74415	chr10	4932442E05Rik		1.1	pancreas	0.98	RIKEN cDNA 4932442E05 gene
71037	chr14	4933401F05Rik		85.5	testis	0.95	RIKEN cDNA 4933401F05 gene
74426	chr01	4933402D24Rik		1.1	pancreas	0.99	RIKEN cDNA 4933402D24 gene
330820	chr08	4933402J07Rik		176.5	testis	0.96	RIKEN cDNA 4933402J07 gene
71060	chr07	4933403G17Rik		27.8	testis	0.97	RIKEN cDNA 4933403G17 gene
74401	chr02	4933406J08Rik		2.3	salivary gland	0.97	RIKEN cDNA 4933406J08 gene
74440	chr08	4933407C03Rik		15.2	medial olfactory epithelium	4.87	RIKEN cDNA 4933407C03 gene
71146	chr19	4933417O08Rik		3.6	dorsal striatum	3.28	RIKEN cDNA 4933417O08 gene
71183	chr06	4933425B16Rik		4.2	testis	1.09	RIKEN cDNA 4933425B16 gene
217684	chr12	4933426M11Rik		2.5	lung	0.55	RIKEN cDNA 4933426M11 gene
664620	chr04	4933427I04Rik					Riken cDNA 4933427I04 gene
66779	chr16	4933432I09Rik		1.7	liver	0.94	RIKEN cDNA 4933432I09 gene
66787	chr12	4933433P14Rik		1.9	dorsal root ganglia	1.02	RIKEN cDNA 4933433P14 gene
71203	chr11	4933434M16Rik		1.3	fertilized egg	0.98	RIKEN cDNA 4933434M16 gene
74478	chr16	4933437K13Rik		3.2	lymphnode	0.82	RIKEN cDNA 4933437K13 gene
68190	chr16	5330426P16Rik		6	epidermis	1.04	RIKEN cDNA 5330426P16 gene
78271	chr14	5330427O13Rik		2	spleen	0.98	RIKEN cDNA 5330427O13 gene
319888	chr18	5330437I02Rik		14.5	pituitary	0.97	RIKEN cDNA 5330437I02 gene
381325	chr01	5330438I03Rik		25.2	olfactory bulb	10.72	RIKEN cDNA 5330438I03 gene
108832	chr02	5430405G05Rik		1.4	salivary gland	1.05	RIKEN cDNA 5430405G05 gene
71406	chr04	5430416O09Rik		2.1	brown fat	1.07	RIKEN cDNA 5430416O09 gene
73847	chr02	5430432M24Rik		42.7	testis	0.94	RIKEN cDNA 5430432M24 gene
78088	chr05	5730467H21Rik		11	small intestine	3.27	RIKEN cDNA 5730467H21 gene
67976	chr15	5730502D15Rik		5.9	salivary gland	0.33	RIKEN cDNA 5730502D15 gene
70638	chr07	5730507A09Rik		1.7	vomeralnasal organ	1.54	RIKEN cDNA 5730507A09 gene
215512	chr11	5730593F17Rik		15.9	bonemarrow	0.46	RIKEN cDNA 5730593F17 gene
244234	chr07	5830411N06Rik					RIKEN cDNA 5830411N06 gene
76022	chr03	5830417I10Rik		1.9	embryo day 6.5	0.99	RIKEN cDNA 5830417I10 gene
76061	chr15	5830427D03Rik		17.1	thymus	0.95	RIKEN cDNA 5830427D03 gene
76041	chr13	5830436D01Rik		2.3	B220+ B-cells	0.93	RIKEN cDNA 5830436D01 gene
76080	chr02	5830472M02Rik		15.6	B220+ B-cells	2.2	RIKEN cDNA 5830472M02 gene
76116	chr17	5830477G23Rik		1.6	thyroid	1	RIKEN cDNA 5830477G23 gene
109032	chr01	5830484A20Rik		33.3	CD4+T-cells	0.72	RIKEN cDNA 5830484A20 gene
320939	chr04	5930403L14Rik		2.2	kidney	1.43	RIKEN cDNA 5930403L14 gene
214585	chr02	6030465E24Rik		11.1	embryo day 6.5	0.99	RIKEN cDNA 6030465E24 gene
432645	chr12	6030469F06Rik					RIKEN cDNA 6030469F06 gene
76133	chr14	6230400D17Rik		1.7	spleen	0.98	RIKEN cDNA 6230400D17 gene
103712	chr11	6330403K07Rik		566	hypothalamus	137.69	RIKEN cDNA 6330403K07 gene
442797	chr07	6330444E15Rik					RIKEN cDNA 6330444E15 gene
193385	chr13	6330500D04Rik	*	21.9	CD4+T-cells	1.86	RIKEN cDNA 6330500D04 gene
229474	chr03	6330505N24Rik	*				RIKEN cDNA 6330505N24 gene
381933	chr07	6430531B16Rik		14.3	testis	0.94	RIKEN cDNA 6430531B16 gene
619300	chr16	6430553K19Rik					RIKEN cDNA 6430553K19 gene
243300	chr05	6430598A04Rik		3.9	hypothalamus	2.45	RIKEN cDNA 6430598A04 gene
381280	chr01	6430706D22Rik		6.1	thymus	0.46	RIKEN cDNA 6430706D22 gene
231842	chr05	6530401C20Rik		2	thyroid	1.37	RIKEN cDNA 6530401C20 gene
328092	chr12	6530401N04Rik		1.4	brown fat	0.96	RIKEN cDNA 6530401N04 gene
328479	chr14	6530402A20		1.8	bonemarrow	0.95	hypothetical protein 6530402A20
77117	chr13	6720457D02Rik		2.5	spleen	0.86	RIKEN cDNA 6720457D02 gene
211378	chr13	6720489N17Rik		3.5	oocyte	0.94	RIKEN cDNA 6720489N17 gene
212114	chr03	8030451K01Rik		2.3	salivary gland	0.92	RIKEN cDNA 8030451K01 gene
414083	chr04	8030463A06Rik		1.6	oocyte	0.98	RIKEN cDNA 8030463A06 gene
74525	chr06	8430419L09Rik		6.8	preoptic	4.85	RIKEN cDNA 8430419L09 gene
71508	chr13	8430426H19Rik		2.5	bonemarrow	0.82	RIKEN cDNA 8430426H19 gene
327747	chr10	9030224M15Rik	*	1.7	uterus	0.98	RIKEN cDNA 9030224M15 gene
320336	chr05	9030227G01Rik		4.2	pituitary	0.92	RIKEN cDNA 9030227G01 gene
378878	chr06	9130019P16Rik	*	1.4	pancreas	0.99	RIKEN cDNA 9130019P16 gene
75761	chr15	9130022K13Rik		44	small intestine	0.95	RIKEN cDNA 9130022K13 gene
230726	chr04	9130416B15		1.2	embryo day 6.5	0.99	hypothetical protein 9130416B15
66819	chr04	9130422G05Rik		2.7	spinal cord lower	1.41	RIKEN cDNA 9130422G05 gene
619293	chr11	9230009I02Rik					RIKEN cDNA 9230009I02 gene
319829	chr15	9330154K18Rik		1.8	bonemarrow	0.98	RIKEN cDNA 9330154K18 gene
77225	chr12	9330161L09Rik		1.3	spleen	0.98	RIKEN cDNA 9330161L09 gene
230996	chr04	9430015G10Rik		2.1	embryo day 10.5	0.97	RIKEN cDNA 9430015G10 gene
231093	chr05	9430057O19Rik		113.4	testis	0.92	RIKEN cDNA 9430057O19 gene
77358	chr15	9430069I07Rik		1.6	spinal cord upper	1.12	RIKEN cDNA 9430069I07 gene
320590	chr06	9430071P14Rik		12.3	vomeralnasal organ	0.95	RIKEN cDNA 9430071P14 gene
78568	chr15	9630009A06Rik					RIKEN cDNA 9630009A06 gene
320111	chr17	9630019K15Rik	*	5.7	substantia nigra	1.34	RIKEN cDNA 9630019K15 gene
277898	chr06	9830102E05Rik		7.3	fertilized egg	0.96	RIKEN cDNA 9830102E05 gene
226438	chr01	9830123M21Rik		2.5	skeletal muscle	0.97	RIKEN cDNA 9830123M21 gene
268759	chr14	9930012K11Rik		11.3	digits	0.95	RIKEN cDNA 9930012K11 gene
320040	chr11	9930039A11Rik		3.7	pancreas	0.96	RIKEN cDNA 9930039A11 gene
245240	chr11	9930111J21Rik		7.2	B220+ B-cells	0.87	RIKEN cDNA 9930111J21 gene
319266	chr01	A130010J15Rik		2.9	prostate	0.94	RIKEN cDNA A130010J15 gene
319630	chr12	A130014H13Rik		1.9	thymus	0.97	RIKEN cDNA A130014H13 gene
328839	chr17	A130033B22		4.2	pancreas	0.97	hypothetical protein A130033B22
619290	chr08	A230072I06Rik					RIKEN cDNA A230072I06 gene
231510	chr05	A230097K15Rik	*	37.1	adipose tissue	0.97	RIKEN cDNA A230097K15 gene
268859	chr16	A2bp1	*	115.5	hippocampus	100.29	ataxin 2 binding protein 1
77767	chr02	A330104H05Rik		190.9	spinal cord upper	10.98	RIKEN cDNA A330104H05 gene
235327	chr09	A430041E03		1.3	ovary	0.97	hypothetical protein A430041E03
217122	chr11	A430060F13Rik		4.2	oocyte	0.94	RIKEN cDNA A430060F13 gene
214642	chr06	A430107O13Rik	*	10.7	ovary	0.9	RIKEN cDNA A430107O13 gene
381287	chr01	A530032D15Rik					RIKEN cDNA A530032D15Rik gene
319977	chr01	A530079E22Rik		3.2	dorsal striatum	2.42	RIKEN cDNA A530079E22 gene
664702	chr17	A530088E08Rik					RIKEN cDNA A530088E08 gene
319293	chr13	A530099J19Rik		2.9	CD8+T-cells	0.99	RIKEN cDNA A530099J19 gene
219065	chr14	A630038E17Rik		2.3	embryo day 8.5	0.62	RIKEN cDNA A630038E17 gene
329513	chr02	A730036I17Rik		1.3	dorsal striatum	1.04	RIKEN cDNA A730036I17 gene
241128	chr01	A830043J08Rik		2.4	oocyte	0.97	RIKEN cDNA A830043J08 gene
320522	chr11	A830053O21Rik	*	1.5	pancreas	0.97	RIKEN cDNA A830053O21 gene
228564	chr02	A930004K21Rik		11	oocyte	1.05	RIKEN cDNA A930004K21 gene
68163	chr08	A930006D01Rik					RIKEN cDNA A930006D01 gene
229780	chr03	A930028L21Rik		1.9	blastocysts	0.92	RIKEN cDNA A930028L21 gene
53960	chr16	AA066038					EST AA066038
212439	chr01	AA986860		27.7	lung	0.91	expressed sequence AA986860
78894	chr05	Aacs		6.4	adipose tissue	1.48	acetoacetyl-CoA synthetase
69684	chr11	Aarsd1		3.8	embryo day 6.5	1.75	alanyl-tRNA synthetase domain containing 1
11303	chr04	Abca1		11.7	adrenalgland	0.55	ATP-binding cassette, sub-family A (ABC1), member 1
320631	chr07	Abca15		3.2	testis	0.99	ATP-binding cassette, sub-family A (ABC1), member 15
11304	chr03	Abca4		18.7	retina	0.98	ATP-binding cassette, sub-family A (ABC1), member 4
27413	chr02	Abcb11		192.5	liver	0.98	ATP-binding cassette, sub-family B (MDR/TAP), member 11
76192	chr02	Abhd12		5.6	cerebral cortex	5.63	abhydrolase domain containing 12
67469	chr09	Abhd5		10.8	mammary gland (lact)	0.84	abhydrolase domain containing 5
66610	chr11	Abi3					ABI gene family, member 3
11350	chr02	Abl1		1.5	thyroid	0.97	v-abl Abelson murine leukemia oncogene 1
226251	chr19	Ablim1		8.2	CD8+T-cells	0.94	actin-binding LIM protein 1
109934	chr11	Abr		11	preoptic	8.75	active BCR-related gene
11423	chr05	Ache	*	56	preoptic	4.96	acetylcholinesterase
104112	chr11	Acly		11.5	adrenalgland	0.81	ATP citrate lyase
11430	chr11	Acox1		14.6	liver	1.43	acyl-Coenzyme A oxidase 1, palmitoyl
11431	chr12	Acp1		3.6	testis	0.98	acid phosphatase 1, soluble
216739	chr11	Acsl6		34	medial olfactory epithelium	12.53	acyl-CoA synthetase long-chain family member 6
68738	chr02	Acss1	*	15.1	kidney	0.66	acyl-CoA synthetase short-chain family member 1
11459	chr08	Acta1	*	346	skeletal muscle	5.15	actin, alpha 1, skeletal muscle
11461	chr05	Actb		44.3	embryo day 6.5	0.92	actin, beta, cytoplasmic
11465	chr11	Actg1		1.6	blastocysts	0.94	actin, gamma, cytoplasmic 1
11472	chr13	Actn2		699.4	heart	1.63	actinin alpha 2
71670	chr19	Acy3		687.8	kidney	0.96	aspartoacylase (aminoacylase) 3
11490	chr03	Adam15		3.7	umbilical cord	1.2	a disintegrin and metallopeptidase domain 15 (metargidin)
11501	chr07	Adam8		11.5	vomeralnasal organ	0.85	a disintegrin and metallopeptidase domain 8
271127	chr13	Adamts16	*	2.2	spinal cord upper	1.03	a disintegrin-like and metallopetidase (reprolysin type) with thrombospondin type 1 motif, 16
208936	chr08	Adamts18	*	1.1	pancreas	0.98	a disintegrin-like and metallopeptidase (reprolysin type) with thrombospondin type 1 motif, 18
77794	chr02	Adamtsl2		1.3	lung	1.02	ADAMTS-like 2
268822	chr15	Adck5		12.8	adrenalgland	0.93	aarF domain containing kinase 5
210044	chr13	Adcy2	*	11.6	preoptic	9.47	adenylate cyclase 2
104110	chr14	Adcy4	*	16	lung	0.9	adenylate cyclase 4
11512	chr15	Adcy6		4.4	thymus	0.66	adenylate cyclase 6
11515	chr16	Adcy9	*	17.2	oocyte	5.87	adenylate cyclase 9
11516	chr17	Adcyap1		14.2	hypothalamus	1.62	adenylate cyclase activating polypeptide 1
11519	chr06	Add2		56.4	dorsal root ganglia	48.41	adducin 2 (beta)
27360	chr19	Add3		4.9	B220+ B-cells	1.12	adducin 3 (gamma)
11522	chr03	Adh1		370.8	adrenalgland	0.38	alcohol dehydrogenase 1 (class I)
104923	chr12	Adi1		8	prostate	0.61	acireductone dioxygenase 1
11450	chr16	Adipoq		1674.1	adipose tissue	0.77	adiponectin, C1Q and collagen domain containing
11540	chr10	Adora2a	*	9.3	dorsal striatum	2.64	adenosine A2a receptor
11552	chr02	Adra2b	*	1.4	pancreas	0.98	adrenergic receptor, alpha 2b
11555	chr18	Adrb2	*	24.9	lung	0.79	adrenergic receptor, beta 2
56436	chr02	Adrm1		2.5	blastocysts	1.14	adhesion regulating molecule 1
16764	chr01	Aff3	*	2	B220+ B-cells	0.96	AF4/FMR2 family, member 3
271813	chr02	Agbl2		3.4	pancreas	0.98	ATP/GTP binding protein-like 2
77559	chr03	Agl		3.8	skeletal muscle	0.95	amylo-1,6-glucosidase, 4-alpha-glucanotransferase
102247	chr08	Agpat6		1.9	brown fat	0.96	1-acylglycerol-3-phosphate O-acyltransferase 6 (lysophosphatidic acid acyltransferase, zeta)
67269	chr13	Agtpbp1		1.4	bonemarrow	0.95	ATP/GTP binding protein 1
11608	chr03	Agtr1b		8.1	adrenalgland	0.94	angiotensin II receptor, type 1b
23796	chr02	Agtrl1		4.3	embryo day 8.5	0.95	angiotensin receptor-like 1
11611	chr01	Agxt		59.2	liver	0.98	alanine-glyoxylate aminotransferase
66395	chr19	Ahnak	*	12.6	digits	0.19	AHNAK nucleoprotein (desmoyokin)
106877	chr18	AI173486		42.4	lung	3.13	expressed sequence AI173486
209018	chr16	AI315068		1.3	fertilized egg	0.97	expressed sequence AI315068
239667	chr15	AI317237		5.5	oocyte	1.68	expressed sequence AI317237
102502	chr09	AI427122	*	95.4	small intestine	1	expressed sequence AI427122
209683	chr05	AI428795		15.8	umbilical cord	1.19	expressed sequence AI428795
226252	chr19	AI450540		2.7	thymus	0.98	expressed sequence AI450540
231506	chr05	AI461788		6.4	oocyte	0.91	expressed sequence AI461788
102097	chr08	AI465270					expressed sequence AI465270
237730	chr11	AI595406	*				expressed sequence AI595406
100182	chr04	AI597013		67.3	CD4+T-cells	0.83	expressed sequence AI597013
216705	chr11	AI642036		4.7	prostate	0.39	expressed sequence AI642036
107242	chr19	AI837181		1.9	cerebellum	1.66	expressed sequence AI837181
104885	chr12	AI839735		55	preoptic	23.36	expressed sequence AI839735
407243	chr02	AI840826					expressed sequence AI840826
101694	chr07	AI854517					expressed sequence AI854517
11630	chr10	Aim1		38.7	digits	0.8	absent in melanoma 1
380739	chr06	AK190093					cDNA sequence AK190093
219181	chr14	Akap11		9.6	amygdala	4.3	A kinase (PRKA) anchor protein 11
238161	chr12	Akap6		10.8	dorsal root ganglia	4.24	A kinase (PRKA) anchor protein 6
11657	chr05	Alb1		6695.4	liver	0.97	albumin 1
110695	chr18	Aldh7a1					aldehyde dehydrogenase family 7, member A1
237320	chr10	Aldh8a1		134.6	kidney	1.03	aldehyde dehydrogenase 8 family, member A1
66248	chr03	Alg5		7.2	prostate	0.52	asparagine-linked glycosylation 5 homolog (yeast, dolichyl-phosphate beta-glucosyltransferase)
11682	chr17	Alk	*	2.4	preoptic	1.15	anaplastic lymphoma kinase
11685	chr11	Alox12e	*	61.2	epidermis	0.93	arachidonate lipoxygenase, epidermal
116904	chr07	Alpk3		63.6	skeletal muscle	0.83	alpha-kinase 3
23802	chr08	Amfr		3.2	adrenalgland	1.28	autocrine motility factor receptor
56332	chr09	Amotl2		14.1	blastocysts	0.47	angiomotin like 2
11727	chr14	Ang1		21.8	liver	0.96	angiogenin, ribonuclease A family, member 1
219033	chr14	Ang4		196.3	large intestine	0.91	angiogenin, ribonuclease A family, member 4
11601	chr08	Angpt2		16.4	umbilical cord	0.89	angiopoietin 2
57875	chr17	Angptl4					angiopoietin-like 4
11735	chr10	Ank3		13.3	spinal cord lower	8.35	ankyrin 3, epithelial
384945	chr09	Ankdd1a		1.9	oocyte	0.98	ankyrin repeat and death domain containing 1A
107351	chr19	Ankrd15		13.5	tongue	0.39	ankyrin repeat domain 15
245886	chr07	Ankrd27		1.2	salivary gland	0.98	ankyrin repeat domain 27 (VPS9 domain)
329154	chr01	Ankrd44		3.7	CD8+T-cells	0.93	ankyrin repeat domain 44
72615	chr16	Anks3		1.9	B220+ B-cells	0.94	ankyrin repeat and sterile alpha motif domain containing 3
12306	chr09	Anxa2		12.4	dorsal root ganglia	0.06	annexin A2
11745	chr05	Anxa3		35.2	lung	0.74	annexin A3
11749	chr11	Anxa6		7.6	CD8+T-cells	0.71	annexin A6
71872	chr01	Aox4		284.7	tongue	1.05	aldehyde oxidase 4
217030	chr11	Ap1gbp1		2.6	B220+ B-cells	1.1	AP1 gamma subunit binding protein 1
11774	chr13	Ap3b1		5.8	blastocysts	0.87	adaptor-related protein complex 3, beta 1 subunit
108011	chr02	Ap4e1		4.8	thymus	0.94	adaptor-related protein complex AP-4, epsilon 1
494504	chr18	Apcdd1					adenomatosis polyposis coli down-regulated 1
226548	chr01	Aph1a		3.1	digits	0.7	anterior pharynx defective 1a homolog (C. elegans)
11811	chr17	Apobec2		748.2	skeletal muscle	0.83	apolipoprotein B editing complex 2
71281	chr01	Apobec4		19.2	testis	0.96	apolipoprotein B mRNA editing enzyme, catalytic polypeptide-like 4 (putative)
100710	chr05	Aprin					androgen-induced proliferation inhibitor
11821	chr08	Aprt		10.2	embryo day 6.5	1	adenine phosphoribosyl transferase
66408	chr04	Aptx		1.5	thyroid	1	aprataxin
11832	chr04	Aqp7		2.5	embryo day 8.5	0.99	aquaporin 7
99371	chr02	Arfgef2		1.2	substantia nigra	0.94	ADP-ribosylation factor guanine nucleotide-exchange factor 2 (brefeldin A-inhibited)
66182	chr11	Arfl4		3.6	embryo day 6.5	1.35	ADP-ribosylation factor 4-like
70497	chr07	Arhgap17		7.8	B220+ B-cells	0.45	Rho GTPase activating protein 17
239027	chr14	Arhgap22		2.4	embryo day 6.5	0.97	Rho GTPase activating protein 22
58996	chr11	Arhgap23		4.2	substantia nigra	2.12	Rho GTPase activating protein 23
232201	chr06	Arhgap25		3.3	pancreas	0.98	Rho GTPase activating protein 25
214137	chr03	Arhgap29	*	14.6	testis	0.97	Rho GTPase activating protein 29
109270	chr15	Arhgap8		4.8	B220+ B-cells	1.17	Rho GTPase activating protein 8
234094	chr08	Arhgef10		7.7	substantia nigra	1	Rho guanine nucleotide exchange factor (GEF) 10
207212	chr07	Arhgef17	*	10.6	preoptic	5.69	Rho guanine nucleotide exchange factor (GEF) 17
16800	chr03	Arhgef2					rho/rac guanine nucleotide exchange factor (GEF) 2
71704	chr14	Arhgef3		6.1	CD4+T-cells	1.55	Rho guanine nucleotide exchange factor (GEF) 3
226970	chr01	Arhgef4		41.1	hippocampus	35.49	Rho guanine nucleotide exchange factor (GEF) 4
239985	chr17	Arid1b		3.1	oocyte	0.95	AT rich interactive domain 1B (Swi1 like)
219144	chr14	Arl11		8.8	bone	0.95	ADP-ribosylation factor-like 11
218639	chr13	Arl15		2.8	lung	1.3	ADP-ribosylation factor-like 15
11865	chr07	Arntl		25.4	oocyte	1.27	aryl hydrocarbon receptor nuclear translocator-like
76709	chr01	Arpc2		5.6	blastocysts	0.95	actin related protein 2/3 complex, subunit 2
74100	chr09	Arpp21		108.6	dorsal striatum	47.68	cyclic AMP-regulated phosphoprotein, 21
11883	chr15	Arsa		13.3	testis	1.86	arylsulfatase A
65247	chr01	Asb1		4.1	testis	1.1	ankyrin repeat and SOCS box-containing protein 1
78910	chr06	Asb15		35.1	skeletal muscle	0.94	ankyrin repeat and SOCS box-containing protein 15
65256	chr12	Asb2		60.5	skeletal muscle	0.79	ankyrin repeat and SOCS box-containing protein 2
78541	chr15	Asb8		4.5	skeletal muscle	1.12	ankyrin repeat and SOCS box-containing protein 8
17172	chr10	Ascl1	*	2.9	pituitary	0.98	achaete-scute complex homolog-like 1 (Drosophila)
77040	chr01	Atg16l1		20.9	fertilized egg	1.48	autophagy-related 16-like 1 (yeast)
74244	chr06	Atg7					autophagy-related 7 (yeast)
231287	chr05	Atp10d		24.9	B220+ B-cells	0.83	ATPase, Class V, type 10D
224079	chr16	Atp13a4		3.9	mammary gland (lact)	0.92	ATPase type 13A4
98660	chr01	Atp1a2					ATPase, Na+/K+ transporting, alpha 2 polypeptide
11932	chr11	Atp1b2	*	50.2	substantia nigra	2.83	ATPase, Na+/K+ transporting, beta 2 polypeptide
11937	chr07	Atp2a1		862.3	skeletal muscle	1.35	ATPase, Ca++ transporting, cardiac muscle, fast twitch 1
53313	chr11	Atp2a3	*	105.8	thyroid	0.76	ATPase, Ca++ transporting, ubiquitous
11941	chr06	Atp2b2	*	42.5	cerebellum	12.63	ATPase, Ca++ transporting, plasma membrane 2
235574	chr09	Atp2c1		28.1	fertilized egg	2.26	ATPase, Ca++-sequestering
11951	chr11	Atp5g1		7.6	heart	1.14	ATP synthase, H+ transporting, mitochondrial F0 complex, subunit c (subunit 9), isoform 1
228033	chr02	Atp5g3		3.2	heart	1.08	ATP synthase, H+ transporting, mitochondrial F0 complex, subunit c (subunit 9), isoform 3
338375	chr01	Atp6v1g3		1.7	thyroid	0.99	ATPase, H+ transporting, lysosomal V1 subunit G3
54667	chr03	Atp8b2		2.3	umbilical cord	1	Atpase, class I, type 8B, member 2
241633	chr02	Atp8b4		1.3	CD8+T-cells	0.98	ATPase, class I, type 8B, member 4
11990	chr02	Atrn		5.8	bladder	1.18	attractin
226255	chr19	Atrnl1		9.2	dorsal root ganglia	3.65	attractin like 1
54138	chr15	Atxn10		4.9	placenta	1.95	ataxin 10
380753	chr12	Atxn7l1					ataxin 7-like 1
225523	chr18	AU016693		4	fertilized egg	1.01	expressed sequence AU016693
105590	chr14	AU017455					expressed sequence AU017455
216831	chr11	AU040829		38	preoptic	37.54	expressed sequence AU040829
69534	chr19	Avpi1		18.3	digits	2.31	arginine vasopressin-induced 1
26361	chr01	Avpr1b	*	2.7	spleen	0.93	arginine vasopressin receptor 1B
106014	chr15	AW049604	*	25.7	preoptic	11.3	expressed sequence AW049604
381199	chr19	AW125688		18	substantia nigra	12.62	expressed sequence AW125688
106522	chr17	AW548124	*	18.3	adrenalgland	0.83	expressed sequence AW548124
270084	chr08	Aytl1	*	1.5	oocyte	0.98	acyltransferase like 1
320871	chr07	B230206H07Rik		4.1	trigeminal	0.98	RIKEN cDNA B230206H07 gene
320705	chr01	B230209C24Rik		90.8	spinal cord lower	14.67	RIKEN cDNA B230209C24 gene
328314	chr13	B230311A21					hypothetical protein B230311A21
76898	chr09	B3gat1		20.6	cerebral cortex	20.63	beta-1,3-glucuronyltransferase 1 (glucuronosyltransferase P)
53625	chr11	B3gnt2		7.3	vomeralnasal organ	0.72	UDP-GlcNAc:betaGal beta-1,3-N-acetylglucosaminyltransferase 2
320786	chr06	B430006D22Rik					RIKEN cDNA B430006D22 gene
320974	chr02	B430119L13Rik	*	22.7	blastocysts	0.96	RIKEN cDNA B430119L13 gene
70369	chr12	Bag5		31.4	testis	1.48	BCL2-associated athanogene 5
108100	chr11	Baiap2	*	7.2	dorsal striatum	5.81	brain-specific angiogenesis inhibitor 1-associated protein 2
66898	chr05	Baiap2l1		27.4	oocyte	0.91	BAI1-associated protein 2-like 1
104709	chr11	BB220380		1.7	bone	0.97	expressed sequence BB220380
216892	chr11	BC011467		3.7	snout epidermis	1.13	cDNA sequence BC011467
224093	chr16	BC022623	*	14.8	B220+ B-cells	1.19	cDNA sequence BC022623
234699	chr08	BC022641		11.7	fertilized egg	1.15	cDNA sequence BC022641
269739	chr06	BC022713		3.9	pancreas	1.01	cDNA sequence BC022713
232855	chr07	BC023179		1.7	spleen	1.08	cDNA sequence BC023179
231668	chr05	BC023744		7.9	large intestine	0.86	cDNA sequence BC023744
234677	chr08	BC026374		15.5	snout epidermis	1.16	cDNA sequence BC026374
208618	chr02	BC026657		3.8	fertilized egg	2.72	cDNA sequence BC026657
212937	chr13	BC027057		2.5	bonemarrow	0.99	cDNA sequence BC027057
277154	chr14	BC030046					cDNA sequence BC030046
216881	chr11	BC030477	*	17.3	preoptic	5.1	cDNA sequence BC030477
223917	chr15	BC031593		363.8	snout epidermis	0.98	cDNA sequence BC031593
270151	chr09	BC034204		6	blastocysts	1	cDNA sequence BC034204
207785	chr15	BC035295		66.8	oocyte	3.67	cDNA sequence BC035295
212733	chr17	BC038613	*	7.4	tongue	0.91	cDNA sequence BC038613
192976	chr11	BC046404		1.5	pancreas	0.97	cDNA sequence BC046404
223927	chr15	BC048502					cDNA sequence BC048502
434439	chr09	BC048562		30.4	testis	0.97	cDNA sequence BC048562
234384	chr08	BC051227		3.5	adrenalgland	1	cDNA sequence BC051227
408061	chr18	BC051408					cDNA sequence BC051408
240063	chr17	BC052046		3.6	preoptic	1.7	cDNA sequence BC052046
407831	chr17	BC054438		114.1	lung	1.07	cDNA sequence BC054438
269152	chr01	BC056349		3.2	dorsal root ganglia	0.93	cDNA sequence BC056349
414077	chr08	BC056474		1.6	snout epidermis	0.95	cDNA sequence BC056474
244654	chr08	BC060632	*	7.9	cerebellum	1.56	cDNA sequence BC060632
277360	chr02	BC067047		13.3	CD8+T-cells	5.57	cDNA sequence BC067047
278679	chr15	BC085284					cDNA sequence BC085284
12927	chr08	Bcar1		2.7	cerebellum	0.99	breast cancer anti-estrogen resistance 1
29815	chr03	Bcar3		13.4	oocyte	0.91	breast cancer anti-estrogen resistance 3
66165	chr07	Bccip		2.3	B220+ B-cells	0.6	BRCA2 and CDKN1A interacting protein
231803	chr05	Bcdin3		5.9	testis	1.16	bin3, bicoid-interacting 3, homolog (Drosophila)
14025	chr11	Bcl11a	*	23.1	B220+ B-cells	1.67	B-cell CLL/lymphoma 11A (zinc finger protein)
58208	chr12	Bcl11b	*	39.4	thymus	1.38	B-cell leukemia/lymphoma 11B
12048	chr02	Bcl2l1					Bcl2-like 1
12053	chr16	Bcl6		5.5	thymus	1.19	B-cell leukemia/lymphoma 6
12029	chr11	Bcl6b	*	1.8	spleen	0.96	B-cell CLL/lymphoma 6, member B
63857	chr08	Bcmo1		6	testis	0.97	beta-carotene 15,15'-monooxygenase
76895	chr13	Bicd2		4.7	oocyte	0.93	bicaudal D homolog 2 (Drosophila)
17060	chr19	Blnk		92	B220+ B-cells	0.96	B-cell linker
171543	chr02	Bmf		6.7	prostate	0.66	Bcl2 modifying factor
12159	chr14	Bmp4	*	16.3	umbilical cord	0.96	bone morphogenetic protein 4
12160	chr09	Bmp5		3.2	lung	1.18	bone morphogenetic protein 5
12167	chr03	Bmpr1b		3.9	oocyte	1.21	bone morphogenetic protein receptor, type 1B
12173	chr07	Bnc1	*	93.7	oocyte	0.83	basonuclin 1
228796	chr02	Bpil3					bactericidal/permeability-increasing protein-like 3
270058	chr08	Bpy2ip1		4.7	cerebral cortex	4.71	BPY2 interacting protein 1
330319	chr06	BQ952480					expressed sequence BQ952480
67382	chr02	Brd3		4.6	embryo day 10.5	0.89	bromodomain containing 3
55951	chr12	Brp44l		1.4	pancreas	0.97	brain protein 44-like
268936	chr17	Brpf3		1.2	skeletal muscle	0.98	bromodomain and PHD finger containing, 3
108013	chr18	Brunol4	*	137.7	amygdala	83.37	bruno-like 4, RNA binding protein (Drosophila)
12215	chr10	Bsg		2.3	placenta	1.16	basigin
74007	chr10	Btbd11	*	7.4	preoptic	1.5	BTB (POZ) domain containing 11
67991	chr02	Btbd14a	*	8.2	spinal cord lower	1.34	BTB (POZ) domain containing 14A
208154	chr16	Btla		223.3	B220+ B-cells	1.18	B and T lymphocyte associated
66912	chr12	Bzw2		8	heart	0.9	basic leucine zipper and W2 domains 2
77220	chr10	C030003D03Rik	*	13.2	adrenalgland	1.53	RIKEN cDNA C030003D03 gene
329385	chr02	C130021I20		2.8	adipose tissue	0.91	hypothetical protein C130021I20
320230	chr02	C130023O10Rik		2.6	bonemarrow	0.91	RIKEN cDNA C130023O10 gene
320701	chr06	C130034I18Rik		28.1	dorsal root ganglia	0.95	RIKEN cDNA C130034I18 gene
619324	chr17	C130040N14Rik					RIKEN cDNA C130040N14 gene
232035	chr06	C130092O11Rik		1.5	pancreas	0.96	RIKEN cDNA C130092O11 gene
56745	chr11	C1qtnf1		25.8	placenta	0.94	C1q and tumor necrosis factor related protein 1
109323	chr05	C1qtnf7		4.1	lung	0.88	C1q and tumor necrosis factor related protein 7
329070	chr19	C230050L11		1.2	embryo day 9.5	0.97	hypothetical protein C230050L11
320784	chr17	C230072F16Rik		1.9	medial olfactory epithelium	0.96	RIKEN cDNA C230072F16 gene
237711	chr11	C230094A16Rik	*	1.4	thyroid	1.01	RIKEN cDNA C230094A16 gene
77480	chr12	C330002I19Rik		3.7	preoptic	1.42	RIKEN cDNA C330002I19 gene
442802	chr08	C330011M18Rik		2.7	brown fat	1.09	RIKEN cDNA C330011M18 gene
319765	chr16	C330012H03Rik		120.8	blastocysts	0.96	RIKEN cDNA C330012H03 gene
232156	chr06	C330016K18Rik		1.7	embryo day 9.5	0.99	RIKEN cDNA C330016K18 gene
212706	chr11	C330016O10Rik		2.7	snout epidermis	1.32	RIKEN cDNA C330016O10 gene
252974	chr10	C330046G03Rik		2	thyroid	1.2	RIKEN cDNA C330046G03 gene
12269	chr01	C4bp		152.6	liver	1.01	complement component 4 binding protein
217310	chr11	C630004H02Rik	*	4	prostate	2.49	RIKEN cDNA C630004H02 gene
245050	chr09	C730027P07Rik		1.2	pancreas	0.99	RIKEN cDNA C730027P07 gene
327988	chr11	C730049P21					hypothetical protein C730049P21
97440	chr08	C76566	*	13.4	pituitary	0.97	expressed sequence C76566
97130	chr04	C77080		11.9	large intestine	1.03	expressed sequence C77080
97180	chr04	C86073					expressed sequence C86073
97476	chr08	C86695					expressed sequence C86695
29866	chr19	Cabp2		19.6	pancreas	1.04	calcium binding protein 2
192650	chr11	Cabp7	*	13.4	hippocampus	0.97	calcium binding protein 7
12289	chr14	Cacna1d	*				calcium channel, voltage-dependent, L type, alpha 1D subunit
12290	chr01	Cacna1e		1.6	fertilized egg	1.19	calcium channel, voltage-dependent, R type, alpha 1E subunit
239556	chr15	Cacna1i	*	1.6	brown fat	1	calcium channel, voltage-dependent, alpha 1I subunit
12292	chr01	Cacna1s		463.6	skeletal muscle	0.96	calcium channel, voltage-dependent, L type, alpha 1S subunit
56808	chr09	Cacna2d2	*	7	substantia nigra	1.47	calcium channel, voltage-dependent, alpha 2/delta subunit 2
12298	chr02	Cacnb4	*	103.7	frontal cortex	59.84	calcium channel, voltage-dependent, beta 4 subunit
54377	chr11	Cacng4	*	1.9	pancreas	1	calcium channel, voltage-dependent, gamma subunit 4
116903	chr07	Calcb		86.9	dorsal root ganglia	0.95	calcitonin-related polypeptide, beta
109624	chr06	Cald1		4.5	umbilical cord	0.88	caldesmon 1
108802	chr04	Calr4		68.5	vomeralnasal organ	0.91	calreticulin 4
12322	chr18	Camk2a		95.8	hippocampus	64.56	calcium/calmodulin-dependent protein kinase II alpha
12323	chr11	Camk2b	*	117.7	olfactory bulb	83.2	calcium/calmodulin-dependent protein kinase II, beta
12325	chr14	Camk2g		13.4	spinal cord lower	7.05	calcium/calmodulin-dependent protein kinase II gamma
207565	chr05	Camkk2					calcium/calmodulin-dependent protein kinase kinase 2, beta
235604	chr09	Camkv		2.8	amygdala	1.18	CaM kinase-like vesicle-associated
216874	chr11	Camta2		16.3	hippocampus	9.93	calmodulin binding transcription activator 2
12337	chr07	Capn5		23.6	dorsal root ganglia	1.97	calpain 5
12336	chr07	Capns1		4.2	dorsal root ganglia	0.58	calpain, small subunit 1
75568	chr15	Capsl		9.3	medial olfactory epithelium	0.96	calcyphosine-like
72605	chr11	Car10	*	126.8	cerebellum	55.16	carbonic anhydrase 10
23831	chr03	Car14	*	23.5	kidney	0.96	carbonic anhydrase 14
12352	chr08	Car5a					carbonic anhydrase 5a, mitochondrial
230099	chr04	Car9		116.4	stomach	0.93	carbonic anhydrase 9
52502	chr16	Carhsp1		7.3	oocyte	0.73	calcium regulated heat stable protein 1
27220	chr13	Cart		90.5	preoptic	2.57	cocaine and amphetamine regulated transcript
140721	chr11	Caskin2		9.4	lung	0.93	cask-interacting protein 2
12390	chr06	Cav2	*	21.4	lung	1.15	caveolin 2
109857	chr16	Cbr3	*	213	stomach	2.38	carbonyl reductase 3
494448	chr15	Cbx6		13.1	cerebral cortex	13.11	chromobox homolog 6
320924	chr18	Ccbe1	*	7.6	prostate	1.01	collagen and calcium binding EGF domains 1
70266	chr02	Ccbl1		10.3	tongue	0.89	cysteine conjugate-beta lyase 1
69339	chr16	Ccdc54		48.3	testis	1.17	coiled-coil domain containing 54
52469	chr11	Ccdc56					coiled-coil domain containing 56
67929	chr08	Ccdc70		35.9	testis	0.95	coiled-coil domain containing 70
67896	chr16	Ccdc80		122	adipose tissue	0.52	coiled-coil domain containing 80
399599	chr19	Ccdc87	*	11.8	testis	0.98	coiled-coil domain containing 87
20295	chr08	Ccl17		1.1	pancreas	0.98	chemokine (C-C motif) ligand 17
24047	chr04	Ccl19		110.6	lymphnode	0.94	chemokine (C-C motif) ligand 19
18829	chr04	Ccl21b		52.1	lymphnode	1.69	chemokine (C-C motif) ligand 21b
20301	chr04	Ccl27		23.6	epidermis	5.3	chemokine (C-C motif) ligand 27
20302	chr11	Ccl3		2	brown fat	0.98	chemokine (C-C motif) ligand 3
20304	chr11	Ccl5		299.2	lymphnode	0.89	chemokine (C-C motif) ligand 5
20305	chr11	Ccl6		98.4	large intestine	0.89	chemokine (C-C motif) ligand 6
12445	chr17	Ccnd3		15.5	thymus	0.49	cyclin D3
240665	chr19	Ccnj		6.3	embryo day 9.5	0.83	cyclin J
235505	chr09	Cd109	*	42.8	digits	0.89	CD109 antigen
12478	chr07	Cd19		99.2	B220+ B-cells	0.97	CD19 antigen
57781	chr16	Cd200r1		3.9	CD4+T-cells	0.97	CD200 receptor 1
217303	chr11	Cd300a		2.6	pancreas	1.77	CD300A antigen
12511	chr19	Cd6		112.2	CD4+T-cells	0.97	CD6 antigen
12512	chr10	Cd63		7	kidney	0.38	Cd63 antigen
12516	chr11	Cd7		54.5	CD8+T-cells	0.87	CD7 antigen
12527	chr06	Cd9		14.9	trigeminal	0.39	CD9 antigen
17064	chr02	Cd93		135.3	lung	0.87	CD93 antigen
68968	chr02	Cdan1		1.2	pancreas	0.99	congenital dyserythropoietic anemia, type I (human)
71713	chr10	Cdc40		3.9	oocyte	1.17	cell division cycle 40 homolog (yeast)
104445	chr15	Cdc42ep1	*	4.6	lung	0.97	CDC42 effector protein (Rho GTPase binding) 1
108912	chr14	Cdca2		35	testis	0.86	cell division cycle associated 2
12550	chr08	Cdh1		12.9	large intestine	0.05	cadherin 1
12562	chr08	Cdh5		14.8	lung	0.94	cadherin 5
12570	chr01	Cdk5r2	*	1.3	B220+ B-cells	1	cyclin-dependent kinase 5, regulatory subunit 2 (p39)
66971	chr02	Cdk5rap1		8.2	oocyte	0.94	CDK5 regulatory subunit associated protein 1
237988	chr11	Cdr2l		3.6	salivary gland	0.95	cerebellar degeneration-related protein 2-like
12590	chr18	Cdx1	*	108.7	large intestine	0.97	caudal type homeo box 1
66996	chr07	Ceacam11		2774.4	placenta	0.96	CEA-related cell adhesion molecule 11
69710	chr07	Centd2		11.7	B220+ B-cells	0.58	centaurin, delta 2
223753	chr15	Cerk	*	9.1	cerebellum	1.12	ceramide kinase
234671	chr08	Ces2		785.1	large intestine	0.96	carboxylesterase 2
102022	chr08	Ces6		285.9	liver	0.96	carboxylesterase 6
68178	chr09	Cgnl1		12.5	kidney	0.56	cingulin-like 1
12647	chr14	Chat		4	spinal cord lower	1.01	choline acetyltransferase
66075	chr06	Chchd3		7.6	skeletal muscle	0.77	coiled-coil-helix-coiled-coil-helix domain containing 3
66170	chr02	Chchd5		2.3	blastocysts	0.93	coiled-coil-helix-coiled-coil-helix domain containing 5
269610	chr04	Chd5	*	6.7	testis	1.49	chromodomain helicase DNA binding protein 5
218865	chr14	Chdh					choline dehydrogenase
71375	chr12	Ches1					checkpoint suppressor 1
108699	chr02	Chn1		103.1	amygdala	98.26	chimerin (chimaerin) 1
69993	chr06	Chn2		211.9	cerebellum	4.88	chimerin (chimaerin) 2
11435	chr02	Chrna1		1.2	embryo day 10.5	1.04	cholinergic receptor, nicotinic, alpha polypeptide 1 (muscle)
110902	chr14	Chrna2		2.1	thyroid	0.98	cholinergic receptor, nicotinic, alpha polypeptide 2 (neuronal)
11438	chr02	Chrna4	*	1.8	substantia nigra	0.98	cholinergic receptor, nicotinic, alpha polypeptide 4
11443	chr11	Chrnb1		2.9	lung	1.09	cholinergic receptor, nicotinic, beta polypeptide 1 (muscle)
76969	chr02	Chst1		43.6	salivary gland	25.68	carbohydrate (keratan sulfate Gal-6) sulfotransferase 1
56506	chr09	Cib2	*	21.5	brown fat	1.54	calcium and integrin binding family member 2
12683	chr18	Cidea	*	695.6	brown fat	1.12	cell death-inducing DNA fragmentation factor, alpha subunit-like effector A
21771	chr08	Cirh1a		4.3	embryo day 6.5	1.09	cirrhosis, autosomal recessive 1A (human)
12709	chr12	Ckb	*	31.8	cerebellum	14.27	creatine kinase, brain
99663	chr03	Clca6		154.4	small intestine	1.01	chloride channel calcium activated 6
18417	chr03	Cldn11	*	187.9	spinal cord upper	38.86	claudin 11
12741	chr16	Cldn5	*	172.1	lung	2.56	claudin 5
56863	chr17	Cldn9		46.1	medial olfactory epithelium	0.98	claudin 9
21922	chr09	Clec3b		20.2	bladder	0.97	C-type lectin domain family 3, member b
209195	chr16	Clic6	*	178.3	stomach	1.34	chloride intracellular channel 6
382551	chr11	Clm3					CMRF-35-like molecule 3
26889	chr08	Cln8		2.3	stomach	1.02	ceroid-lipofuscinosis, neuronal 8
12753	chr05	Clock		3.8	oocyte	1.16	circadian locomoter output cycles kaput
269582	chr04	Clspn		51.9	oocyte	0.96	claspin homolog (Xenopus laevis)
12759	chr14	Clu		5.9	lymphnode	3.16	clusterin
17228	chr14	Cma1		2.4	snout epidermis	0.91	chymase 1, mast cell
545055	chr14	Cma2					chymase 2, mast cell
93674	chr06	Cml3		114.7	kidney	1.01	camello-like 3
67272	chr14	Cmtm5		43.9	spinal cord upper	12.59	CKLF-like MARVEL transmembrane domain containing 5
338403	chr18	Cndp1		13.1	oocyte	0.98	carnosine dipeptidase 1 (metallopeptidase M20 family)
72383	chr07	Cnfn	*	1160.9	tongue	0.98	cornifelin
12794	chr19	Cnih2		107.7	hippocampus	58.92	cornichon homolog 2 (Drosophila)
94220	chr01	Cnnm4	*	8.4	large intestine	0.97	cyclin M4
12804	chr04	Cntfr		1.9	spinal cord lower	1.4	ciliary neurotrophic factor receptor
12808	chr11	Cobl		24.6	small intestine	5.87	cordon-bleu
16834	chr11	Cog1		3.1	testis	1.31	component of oligomeric golgi complex 1
12815	chr17	Col11a2		46.3	bone	0.98	procollagen, type XI, alpha 2
12842	chr11	Col1a1					procollagen, type I, alpha 1
12826	chr08	Col4a1	*	36.9	umbilical cord	0.31	procollagen, type IV, alpha 1
12833	chr10	Col6a1		87.9	uterus	1.07	procollagen, type VI, alpha 1
12839	chr01	Col9a1		35.4	mammary gland (lact)	0.85	procollagen, type IX, alpha 1
382864	chr14	Colq		2.2	thymus	0.97	collagen-like tail subunit (single strand of homotrimer) of asymmetric acetylcholinesterase
235431	chr09	Coro2b		51.9	oocyte	2.39	coronin, actin binding protein, 2B
84682	chr02	Cox4i2	*	4.7	lung	0.92	cytochrome c oxidase subunit IV isoform 2
18117	chr08	Cox4nb		7	embryo day 6.5	0.9	COX4 neighbor
20463	chr17	Cox7a2l		3.3	CD4+T-cells	0.96	cytochrome c oxidase subunit VIIa polypeptide 2-like
12868	chr19	Cox8a		2.9	brown fat	1.91	cytochrome c oxidase, subunit VIIIa
71791	chr06	Cpa4		6.2	digits	0.87	carboxypeptidase A4
208922	chr19	Cpeb3		15.7	fertilized egg	2.9	cytoplasmic polyadenylation element binding protein 3
235415	chr09	Cplx3		1.7	retina	0.97	complexin 3
234577	chr08	Cpne2	*	2.4	preoptic	1	copine II
102278	chr08	Cpne7	*	77.4	hippocampus	6.84	copine VII
211232	chr06	Cpne9					copine family member IX
12894	chr19	Cpt1a		9.7	kidney	0.29	carnitine palmitoyltransferase 1a, liver
12896	chr04	Cpt2		15.7	brown fat	0.3	carnitine palmitoyltransferase 2
55987	chr07	Cpxm2	*	1.8	prostate	0.93	carboxypeptidase X 2 (M14 family)
242939	chr05	Cpz	*	15.4	epidermis	0.97	carboxypeptidase Z
224912	chr17	Crb3		5	large intestine	0.56	crumbs homolog 3 (Drosophila)
78892	chr08	Crispld2	*	133.1	umbilical cord	0.82	cysteine-rich secretory protein LCCL domain containing 2
12931	chr08	Crlf1	*	9.1	tongue	0.92	cytokine receptor-like factor 1
381457	chr03	Crnn		172.4	tongue	0.98	cornulin
12952	chr10	Cry1		112	oocyte	1.15	cryptochrome 1 (photolyase-like)
12955	chr09	Cryab		55	retina	1.51	crystallin, alpha B
12957	chr11	Cryba1		5151.9	retina	0.98	crystallin, beta A1
12962	chr05	Crybb3		330.1	retina	0.97	crystallin, beta B3
12970	chr16	Crygs		4847.3	retina	0.97	crystallin, gamma S
12977	chr03	Csf1	*	10	placenta	1	colony stimulating factor 1 (macrophage)
12981	chr11	Csf2		1.5	embryo day 8.5	0.93	colony stimulating factor 2 (granulocyte-macrophage)
329942	chr04	Csmd2		2.4	pancreas	0.98	CUB and Sushi multiple domains 2
121021	chr09	Cspg4	*	45.8	umbilical cord	0.97	chondroitin sulfate proteoglycan 4
13007	chr01	Csrp1		12.5	bladder	1.51	cysteine and glycine-rich protein 1
13009	chr07	Csrp3		204.6	heart	0.95	cysteine and glycine-rich protein 3
13017	chr07	Ctbp2		16	fertilized egg	0.36	C-terminal binding protein 2
14219	chr10	Ctgf		31.4	umbilical cord	1.58	connective tissue growth factor
13033	chr07	Ctsd		3.4	snout epidermis	0.8	cathepsin D
13038	chr03	Ctsk		40.8	placenta	1.01	cathepsin K
30785	chr06	Cttnbp2	*	15.2	olfactory bulb	7.11	cortactin binding protein 2
330695	chr08	Ctxn1		96.2	cerebral cortex	96.17	cortexin 1
67116	chr19	Cuedc2		1.8	pituitary	1.03	CUE domain containing 2
14007	chr02	Cugbp2		6.6	thymus	1.59	CUG triplet repeat, RNA binding protein 2
13048	chr05	Cutl2		1.8	dorsal striatum	1.02	cut-like 2 (Drosophila)
57266	chr13	Cxcl14	*	10.7	snout epidermis	2.3	chemokine (C-X-C motif) ligand 14
20311	chr05	Cxcl5	*	719.6	vomeralnasal organ	0.95	chemokine (C-X-C motif) ligand 5
67393	chr18	Cxxc5		7.4	cerebellum	2.79	CXXC finger 5
72023	chr03	Cyb561d1		4.6	B220+ B-cells	1.14	cytochrome b-561 domain containing 1
54151	chr15	Cyhr1		8.4	testis	1.63	cysteine and histidine rich 1
232174	chr06	Cyp26b1					cytochrome P450, family 26, subfamily b, polypeptide 1
56448	chr15	Cyp2d22		28.4	liver	3.53	cytochrome P450, family 2, subfamily d, polypeptide 22
76279	chr15	Cyp2d26		833.5	liver	0.97	cytochrome P450, family 2, subfamily d, polypeptide 26
215821	chr10	D10Bwg1379e		24.8	preoptic	14.53	DNA segment, Chr 10, Brigham %26 Women's Genetics 1379 expressed
52897	chr11	D11Bwg0517e	*	24.1	cerebellum	15.39	DNA segment, Chr 11, Brigham %26 Women's Genetics 0517 expressed
52670	chr11	D11Ertd636e		58.6	oocyte	0.97	DNA segment, Chr 11, ERATO Doi 636, expressed
76820	chr12	D12Ertd553e		15.1	amygdala	11.22	DNA segment, Chr 12, ERATO Doi 553, expressed
210998	chr15	D15Ertd621e		5.6	bladder	0.65	DNA segment, Chr 15, ERATO Doi 621, expressed
71919	chr15	D15Ertd682e		6.9	oocyte	1.09	DNA segment, Chr 15, ERATO Doi 682, expressed
52662	chr18	D18Ertd653e		10.1	oocyte	1.07	DNA segment, Chr 18, ERATO Doi 653, expressed
226178	chr19	D19Wsu162e		4.2	placenta	0.53	DNA segment, Chr 19, Wayne State University 162, expressed
328516	chr15	D430034N21					hypothetical protein D430034N21
233865	chr07	D430042O09Rik		24.8	medial olfactory epithelium	0.94	RIKEN cDNA D430042O09 gene
338349	chr04	D530005L17Rik	*	25.8	oocyte	0.71	RIKEN cDNA D530005L17 gene
77522	chr06	D630002J15Rik		14.5	vomeralnasal organ	0.96	RIKEN cDNA D630002J15 gene
242484	chr04	D630039A03Rik		14.3	prostate	0.93	RIKEN cDNA D630039A03 gene
52372	chr06	D6Ertd527e					DNA segment, Chr 6, ERATO Doi 527, expressed
27999	chr06	D6Wsu176e		4.2	vomeralnasal organ	1.48	DNA segment, Chr 6, Wayne State University 176, expressed
213435	chr08	D830007F02Rik		76.1	heart	1.04	RIKEN cDNA D830007F02 gene
320197	chr05	D830046C22Rik		1.4	pituitary	0.95	RIKEN cDNA D830046C22 gene
66817	chr08	D8Bwg1414e		9.9	blastocysts	1.25	DNA segment, Chr 8, Brigham %26 Women's Genetics 1414 expressed
244853	chr09	D930028F11Rik		12.3	prostate	1.2	RIKEN cDNA D930028F11 gene
244923	chr09	D930047P17Rik		436.1	skeletal muscle	0.96	RIKEN cDNA D930047P17 gene
76441	chr17	Daam2	*	1.7	spinal cord lower	0.98	dishevelled associated activator of morphogenesis 2
13131	chr04	Dab1		6.1	hippocampus	4.47	disabled homolog 1 (Drosophila)
13132	chr15	Dab2	*	32.3	adrenalgland	0.68	disabled homolog 2 (Drosophila)
69601	chr02	Dab2ip		4.8	cerebellum	1.74	disabled homolog 2 (Drosophila) interacting protein
13137	chr01	Daf2		19.3	testis	0.96	decay accelerating factor 2
13349	chr01	Darc		33.7	cerebellum	8.17	Duffy blood group, chemokine receptor
13166	chr02	Dbh		162.6	adrenalgland	1.12	dopamine beta hydroxylase
52840	chr02	Dbndd2	*	60.9	substantia nigra	8.33	dysbindin (dystrobrevin binding protein 1) domain containing 2
13191	chr06	Dctn1		7.7	dorsal root ganglia	4.21	dynactin 1
53598	chr04	Dctn3		3.6	trigeminal	2.21	dynactin 3
107986	chr02	Ddb2		55.2	fertilized egg	0.68	damage specific DNA binding protein 2
114874	chr14	Ddhd1					DDHD domain containing 1
53975	chr03	Ddx20		24.2	testis	0.85	DEAD (Asp-Glu-Ala-Asp) box polypeptide 20
654362	chr03	Dear1					dual endothelin 1/angiotensin II receptor 1 homolog (rat)
21945	chr01	Dedd		4.9	testis	1.12	death effector domain-containing
68009	chr08	Defcr20		295.3	small intestine	0.66	defensin related cryptdin 20
382059	chr08	Defcr22					defensin-related cryptdin 22
13239	chr08	Defcr5		2974.6	small intestine	0.97	defensin related cryptdin 5
13244	chr01	Degs1		8.4	fertilized egg	1.01	degenerative spermatocyte homolog 1 (Drosophila)
70785	chr17	Dennd1c		17.7	CD8+T-cells	0.96	DENN/MADD domain containing 1C
209773	chr06	Dennd2a		2.6	oocyte	1.09	DENN/MADD domain containing 2A
329727	chr03	Dennd2c		1.4	bonemarrow	0.93	DENN/MADD domain containing 2C
70377	chr10	Derl3		19.8	thyroid	0.99	Der1-like domain family, member 3
380921	chr14	Dgkh		29	dorsal root ganglia	2.78	diacylglycerol kinase, eta
13371	chr12	Dio2		94.4	uterus	12.96	deiodinase, iodothyronine, type II
64451	chr10	Dip2a		9.2	spinal cord upper	2.27	DIP2 disco-interacting protein 2 homolog A (Drosophila)
330938	chr09	Dixdc1		12.3	cerebellum	3.7	DIX domain containing 1
235339	chr09	Dlat		13.7	heart	2.41	dihydrolipoamide S-acetyltransferase (E2 component of pyruvate dehydrogenase complex)
224997	chr17	Dlgap1	*	138.9	olfactory bulb	86.47	discs, large (Drosophila) homolog-associated protein 1
228836	chr02	Dlgap4	*	15.6	olfactory bulb	9.75	discs, large homolog-associated protein 4 (Drosophila)
13388	chr17	Dll1	*	9.4	lung	1.03	delta-like 1 (Drosophila)
13390	chr02	Dlx1	*	87	olfactory bulb	4.84	distal-less homeobox 1
110084	chr14	Dnahc1		27.5	testis	1.02	dynein, axonemal, heavy chain 1
237806	chr11	Dnahc9		4.3	oocyte	1.04	dynein, axonemal, heavy chain 9
66326	chr03	Dnajc5b		136.8	testis	0.96	DnaJ (Hsp40) homolog, subfamily C, member 5 beta
72685	chr04	Dnajc6		263	amygdala	206.19	DnaJ (Hsp40) homolog, subfamily C, member 6
54152	chr15	Dnalc4		45.7	fertilized egg	3.52	dynein, axonemal, light chain 4
13435	chr12	Dnmt3a		2.3	medial olfactory epithelium	1.52	DNA methyltransferase 3A
94176	chr11	Dock2		23.1	CD8+T-cells	1	dedicator of cyto-kinesis 2
105445	chr14	Dock9		3.5	lung	1.3	dedicator of cytokinesis 9
76829	chr02	Dok5	*	10.6	vomeralnasal organ	8.52	docking protein 5
13479	chr08	Dpep1		123.9	large intestine	0.85	dipeptidase 1 (renal)
70127	chr12	Dpf3	*	1.4	pancreas	1.02	D4, zinc and double PHD fingers, family 3
13483	chr05	Dpp6	*	9.5	amygdala	3.33	dipeptidylpeptidase 6
12934	chr14	Dpysl2		1.3	dorsal striatum	0.97	dihydropyrimidinase-like 2
26757	chr07	Dpysl4	*				dihydropyrimidinase-like 4
13516	chr10	Dspg3		17.4	testis	0.92	dermatan sulphate proteoglycan 3
14357	chr05	Dtx1	*	160.2	B220+ B-cells	11.17	deltex 1 homolog (Drosophila)
80904	chr10	Dtx3		4.5	olfactory bulb	1.69	deltex 3 homolog (Drosophila)
207521	chr19	Dtx4	*	2.9	embryo day 10.5	1.16	deltex 4 homolog (Drosophila)
19252	chr17	Dusp1		15.8	lung	1.89	dual specificity phosphatase 1
63953	chr01	Dusp10		1.7	CD8+T-cells	0.92	dual specificity phosphatase 10
13537	chr02	Dusp2	*				dual specificity phosphatase 2
68440	chr01	Dusp23		3.8	skeletal muscle	0.9	dual specificity phosphatase 23
72349	chr11	Dusp3					dual specificity phosphatase 3 (vaccinia virus phosphatase VH1-related)
240672	chr19	Dusp5		5.6	cerebellum	1.06	dual specificity phosphatase 5
213575	chr17	Dync2li1		7.7	pituitary	1.49	dynein cytoplasmic 2 light intermediate chain 1
21648	chr17	Dynlt1					dynein light chain Tctex-type 1
226040	chr19	E030010A14Rik					RIKEN cDNA E030010A14 gene
381994	chr07	E030018B13Rik					RIKEN cDNA E030018B13 gene
319865	chr04	E130114P18Rik		1.2	liver	0.97	RIKEN cDNA E130114P18 gene
243780	chr06	E330009J07Rik	*	9.6	cerebellum	2.61	RIKEN cDNA E330009J07 gene
270109	chr08	E330039K12Rik	*	6.9	cerebral cortex	6.86	RIKEN cDNA E330039K12 gene
13586	chr14	Ear1					eosinophil-associated, ribonuclease A family, member 1
13587	chr14	Ear2		44.2	lung	0.85	eosinophil-associated, ribonuclease A family, member 2
93719	chr14	Ear6		56.7	bone	1.05	eosinophil-associated, ribonuclease A family, member 6
13599	chr01	Ecel1	*	16.2	preoptic	1.13	endothelin converting enzyme-like 1
13610	chr13	Edg3	*	1.4	spleen	0.98	endothelial differentiation, sphingolipid G-protein-coupled receptor, 3
13615	chr04	Edn2	*	6.7	large intestine	0.94	endothelin 2
13627	chr09	Eef1a1		3.8	CD8+T-cells	0.4	eukaryotic translation elongation factor 1 alpha 1
13628	chr02	Eef1a2	*	266.4	cerebellum	223.19	eukaryotic translation elongation factor 1 alpha 2
13629	chr10	Eef2		2.5	CD8+T-cells	0.92	eukaryotic translation elongation factor 2
68514	chr14	Efha1		2.7	digits	0.53	EF hand domain family A1
27984	chr04	Efhd2		8.3	blastocysts	6.29	EF hand domain containing 2
13636	chr03	Efna1		6.2	lung	0.85	ephrin A1
13640	chr17	Efna5	*	1.5	pancreas	1	ephrin A5
353156	chr02	Egfl7		19.6	lung	1.13	EGF-like domain 7
112407	chr12	Egln3		12.4	snout epidermis	0.94	EGL nine homolog 3 (C. elegans)
13653	chr18	Egr1	*	20.2	olfactory bulb	14.45	early growth response 1
19106	chr17	Eif2ak2		2.6	uterus	0.7	eukaryotic translation initiation factor 2-alpha kinase 2
236511	chr04	Eif2c1					eukaryotic translation initiation factor 2C, 1
239528	chr15	Eif2c2					eukaryotic translation initiation factor 2C, 2
13713	chr10	Elk3		1.4	lung	0.89	ELK3, member of ETS oncogene family
140580	chr13	Elmo1		5.1	substantia nigra	3.59	engulfment and cell motility 1, ced-12 homolog (C. elegans)
140579	chr02	Elmo2		6	olfactory bulb	3.78	engulfment and cell motility 2, ced-12 homolog (C. elegans)
244548	chr08	Elmod2		63.9	oocyte	0.67	ELMO domain containing 2
170439	chr03	Elovl6		22.6	digits	0.92	ELOVL family member 6, elongation of long chain fatty acids (yeast)
74559	chr13	Elovl7	*	11.6	digits	0.94	ELOVL family member 7, elongation of long chain fatty acids (yeast)
140703	chr11	Emid1	*	4.5	bladder	0.95	EMI domain containing 1
100952	chr05	Emilin1		22.1	umbilical cord	0.92	elastin microfibril interfacer 1
68519	chr12	Eml1		20.4	dorsal root ganglia	1.18	echinoderm microtubule associated protein like 1
13731	chr16	Emp2	*	51.6	lung	1	epithelial membrane protein 2
13733	chr17	Emr1		7.6	bone	0.92	EGF-like module containing, mucin-like, hormone receptor-like sequence 1
13796	chr06	Emx1	*	1.4	embryo day 10.5	1.26	empty spiracles homolog 1 (Drosophila)
13807	chr06	Eno2		333.4	preoptic	262.91	enolase 2, gamma neuronal
13809	chr03	Enpep		462.5	small intestine	0.83	glutamyl aminopeptidase
18606	chr15	Enpp2		16.8	hippocampus	3.56	ectonucleotide pyrophosphatase/phosphodiesterase 2
224794	chr17	Enpp4		3.4	spinal cord upper	1.21	ectonucleotide pyrophosphatase/phosphodiesterase 4
83965	chr17	Enpp5		16.6	amygdala	9.35	ectonucleotide pyrophosphatase/phosphodiesterase 5
320981	chr08	Enpp6		15.9	kidney	1.38	ectonucleotide pyrophosphatase/phosphodiesterase 6
67464	chr14	Entpd4		1.8	bonemarrow	0.96	ectonucleoside triphosphate diphosphohydrolase 4
13819	chr17	Epas1	*	169.9	lung	1.11	endothelial PAS domain protein 1
269587	chr04	Epb4.1					erythrocyte protein band 4.1
13822	chr10	Epb4.1l2					erythrocyte protein band 4.1-like 2
13824	chr18	Epb4.1l4a		5.9	pituitary	0.62	erythrocyte protein band 4.1-like 4a
13829	chr14	Epb4.9		20.2	cerebral cortex	20.19	erythrocyte protein band 4.9
13845	chr16	Ephb3		3.5	snout epidermis	1.23	Eph receptor B3
13846	chr05	Ephb4		5.8	lung	0.92	Eph receptor B4
57837	chr11	Eral1		1.7	embryo day 10.5	0.83	Era (G-protein)-like 1 (E. coli)
13872	chr18	Ercc3		3.8	blastocysts	0.93	excision repair cross-complementing rodent repair deficiency, complementation group 3
13876	chr16	Erg		35.5	lung	0.89	avian erythroblastosis virus E-26 (v-ets) oncogene related
50527	chr14	Ero1l		10.8	placenta	1.16	ERO1-like (S. cerevisiae)
74155	chr04	Errfi1		21	liver	0.68	ERBB receptor feedback inhibitor 1
23871	chr09	Ets1	*	70.2	thymus	0.56	E26 avian leukemia oncogene 1, 5' domain
59056	chr05	Evc		23.4	kidney	0.96	Ellis van Creveld gene homolog (human)
14061	chr02	F2		312.7	liver	0.97	coagulation factor II
14066	chr03	F3	*	26.6	trachea	3.06	coagulation factor III
14068	chr08	F7		16.9	liver	0.98	coagulation factor VII
619323	chr10	F730021E23Rik					RIKEN cDNA F730021E23 gene
320664	chr02	F730031O20Rik		1.3	salivary gland	0.92	RIKEN cDNA F730031O20 gene
619308	chr18	F830208F22Rik					RIKEN cDNA F830208F22 gene
12140	chr10	Fabp7		1138.3	olfactory bulb	62.7	fatty acid binding protein 7, brain
56473	chr19	Fads2		38.6	adrenalgland	3.62	fatty acid desaturase 2
72393	chr15	Faim2		54.4	preoptic	15.18	Fas apoptotic inhibitory molecule 2
14104	chr11	Fasn		40.8	brown fat	1.48	fatty acid synthase
23876	chr12	Fbln5	*	1.7	bonemarrow	0.98	fibulin 5
214931	chr17	Fbxl16		81.3	dorsal striatum	3.12	F-box and leucine-rich repeat protein 16
78938	chr14	Fbxo34		62	oocyte	1.59	F-box only protein 34
327959	chr11	Fbxo39		7.5	testis	0.75	F-box protein 39
207215	chr16	Fbxo40		164.6	skeletal muscle	0.97	F-box protein 40
103583	chr11	Fbxw11		3.5	cerebellum	1.86	F-box and WD-40 domain protein 11
109082	chr13	Fbxw17		2.9	dorsal root ganglia	0.91	F-box and WD-40 domain protein 17
231672	chr05	Fbxw8		1.3	medial olfactory epithelium	0.94	F-box and WD-40 domain protein 8
59083	chr16	Fetub		707.2	vomeralnasal organ	0.95	fetuin beta
232237	chr06	Fgd5		7.9	lung	0.96	FYVE, RhoGEF and PH domain containing 5
13998	chr10	Fgd6		1.2	pancreas	0.98	FYVE, RhoGEF and PH domain containing 6
14165	chr13	Fgf10	*	15.4	adipose tissue	0.96	fibroblast growth factor 10
14167	chr16	Fgf12	*	118.7	dorsal root ganglia	44.25	fibroblast growth factor 12
14172	chr11	Fgf18	*	3	epidermis	0.86	fibroblast growth factor 18
56636	chr07	Fgf21		1.4	liver	1.09	fibroblast growth factor 21
14174	chr07	Fgf3	*	1.6	embryo day 7.5	0.98	fibroblast growth factor 3
14198	chr14	Fhit		2	vomeralnasal organ	0.98	fragile histidine triad gene
225288	chr18	Fhod3	*	214.5	oocyte	8.53	formin homology 2 domain containing 3
70598	chr09	Filip1		10.6	umbilical cord	1.34	filamin A interacting protein 1
14247	chr09	Fli1	*	116.1	B220+ B-cells	0.69	Friend leukemia integration 1
68794	chr06	Flnc	*	48	skeletal muscle	0.86	filamin C, gamma (actin binding protein 280)
54418	chr01	Fmn2		431.7	oocyte	28.16	formin 2
14263	chr03	Fmo5		335.9	bladder	0.82	flavin containing monooxygenase 5
14264	chr01	Fmod		148.9	retina	1.92	fibromodulin
14269	chr02	Fnbp1		4	thymus	0.99	formin binding protein 1
68655	chr17	Fndc1		22.1	digits	0.99	fibronectin type III domain containing 1
72007	chr03	Fndc3b		14.8	umbilical cord	0.35	fibronectin type III domain containing 3B
213208	chr09	Fndc6		51	digits	0.97	fibronectin type III domain containing 6
14275	chr07	Folr1		101.5	kidney	0.84	folate receptor 1 (adult)
14276	chr07	Folr2		6.4	adipose tissue	0.97	folate receptor 2 (fetal)
14282	chr07	Fosb		6.7	olfactory bulb	1.56	FBJ osteosarcoma oncogene B
14284	chr05	Fosl2	*	2.3	pancreas	1.07	fos-like antigen 2
17301	chr04	Foxd2	*	1.1	pancreas	0.99	forkhead box D2
14238	chr13	Foxf2	*	23.8	lung	0.98	forkhead box F2
17425	chr05	Foxk1		1.4	testis	0.98	forkhead box K1
329934	chr04	Foxo6	*	2.8	medial olfactory epithelium	0.98	forkhead box O6
108655	chr06	Foxp1		1.3	pancreas	0.98	forkhead box P1
235169	chr09	Foxred1		2.9	adrenalgland	0.95	FAD-dependent oxidoreductase domain containing 1
14287	chr02	Fpgs		56.6	fertilized egg	0.9	folylpolyglutamyl synthetase
14294	chr17	Fprl1		1.6	brown fat	0.97	formyl peptide receptor-like 1
329872	chr04	Frem1					Fras1 related extracellular matrix protein 1
232288	chr06	Frmd4b		12.8	retina	0.57	FERM domain containing 4B
319710	chr12	Frmd6		9.7	digits	2.25	FERM domain containing 6
320027	chr11	Fstl4	*	2.3	dorsal striatum	1.8	follistatin-like 4
14319	chr19	Fth1		2.6	spinal cord upper	1.43	ferritin heavy chain 1
14325	chr04	Ftl1		3.1	kidney	0.52	ferritin light chain 1
56188	chr07	Fxyd1		27	skeletal muscle	1	FXYD domain-containing ion transport regulator 1
17178	chr07	Fxyd3		356.3	stomach	0.91	FXYD domain-containing ion transport regulator 3
18301	chr07	Fxyd5	*				FXYD domain-containing ion transport regulator 5
59095	chr09	Fxyd6		23.8	preoptic	4.25	FXYD domain-containing ion transport regulator 6
14360	chr10	Fyn		13.2	oocyte	2.58	Fyn proto-oncogene
14369	chr01	Fzd7		5.1	umbilical cord	0.66	frizzled homolog 7 (Drosophila)
14371	chr05	Fzd9		3.2	skeletal muscle	1.03	frizzled homolog 9 (Drosophila)
414126	chr13	G630018N14Rik					RIKEN cDNA G630018N14 gene
619327	chr13	G630093K05Rik					RIKEN cDNA G630093K05 gene
14378	chr02	G6pc2		2	pancreas	0.97	glucose-6-phosphatase, catalytic, 2
242425	chr04	Gabbr2	*	3.1	preoptic	2.69	gamma-aminobutyric acid (GABA) B receptor 2
14390	chr16	Gabpa		3.5	thymus	0.5	GA repeat binding protein, alpha
216643	chr11	Gabrp		51.3	trachea	0.97	gamma-aminobutyric acid (GABA-A) receptor, pi
328699	chr16	Gabrr3		1.2	mammary gland (lact)	0.98	gamma-aminobutyric acid (GABA) receptor, rho 3
14415	chr02	Gad1	*	1623	olfactory bulb	306.77	glutamic acid decarboxylase 1
23882	chr13	Gadd45g	*	24.6	uterus	1	growth arrest and DNA-damage-inducible 45 gamma
330217	chr05	Gal3st4	*	5.1	digits	1.04	galactose-3-O-sulfotransferase 4
71685	chr17	Galnt14	*	13.6	dorsal root ganglia	1.38	UDP-N-acetyl-alpha-D-galactosamine:polypeptide N-acetylgalactosaminyltransferase 14
108148	chr08	Galnt2		6.4	umbilical cord	1.06	UDP-N-acetyl-alpha-D-galactosamine:polypeptide N-acetylgalactosaminyltransferase 2
231605	chr05	Galnt9		12.6	cerebellum	7.06	UDP-N-acetyl-alpha-D-galactosamine:polypeptide N-acetylgalactosaminyltransferase 9
209239	chr08	Gan		40.7	snout epidermis	1.07	giant axonal neuropathy
14376	chr19	Ganab		2.3	adrenalgland	0.59	alpha glucosidase 2 alpha neutral subunit
14457	chr11	Gas7		58.8	cerebellum	3.45	growth arrest specific 7
14461	chr06	Gata2	*	82.5	blastocysts	0.96	GATA binding protein 2
14464	chr02	Gata5	*	5	small intestine	0.97	GATA binding protein 5
67092	chr02	Gatm	*	95.7	kidney	8.95	glycine amidinotransferase (L-arginine:glycine amidinotransferase)
14466	chr03	Gba		7	tongue	0.83	glucosidase, beta, acid
72972	chr14	Gcap14		18.6	dorsal root ganglia	1.08	granule cell antiserum positive 14
14559	chr08	Gdf1		27.5	cerebral cortex	27.54	growth differentiation factor 1
23886	chr08	Gdf15		1.2	pancreas	0.98	growth differentiation factor 15
68616	chr05	Gdpd3		7.7	digits	0.94	glycerophosphodiester phosphodiesterase domain containing 3
233552	chr07	Gdpd5	*				glycerophosphodiester phosphodiesterase domain containing 5
14586	chr14	Gfra2	*	3.6	dorsal root ganglia	1.98	glial cell line derived neurotrophic factor family receptor alpha 2
14588	chr02	Gfra4	*	4.2	cerebral cortex	4.23	glial cell line derived neurotrophic factor family receptor alpha 4
74105	chr07	Gga2		14.6	B220+ B-cells	0.72	golgi associated, gamma adaptin ear containing, ARF binding protein 2
14594	chr02	Ggta1		35.8	oocyte	0.41	glycoprotein galactosyltransferase alpha 1, 3
23887	chr10	Ggtla1		2.5	uterus	0.98	gamma-glutamyltransferase-like activity 1
317757	chr06	Gimap5		6.4	B220+ B-cells	0.92	GTPase, IMAP family member 5
231931	chr06	Gimap6		157	CD4+T-cells	0.8	GTPase, IMAP family member 6
54120	chr03	Gipc2		86.6	large intestine	0.76	GIPC PDZ domain containing family, member 2
381853	chr07	Gipr		1.7	spleen	0.97	gastric inhibitory polypeptide receptor
118454	chr11	Gja12		5.6	substantia nigra	1.16	gap junction membrane channel protein alpha 12
14617	chr02	Gja9	*	1.7	retina	1	gap junction membrane channel protein alpha 9
14623	chr14	Gjb6	*	33.6	mammary gland (lact)	12.94	gap junction membrane channel protein beta 6
14633	chr01	Gli2		8.3	umbilical cord	0.93	GLI-Kruppel family member GLI2
384009	chr04	Glipr2		56.6	blastocysts	0.43	GLI pathogenesis-related 2
229588	chr03	Gm128		144	testis	1.07	gene model 128, (NCBI)
383783	chr02	Gm1335					gene model 1335, (NCBI)
381059	chr17	Gm1604					gene model 1604, (NCBI)
328657	chr16	Gm1968					gene model 1968, (NCBI)
216797	chr11	Gm249		1.2	pancreas	0.99	gene model 249, (NCBI)
208424	chr03	Gm412		2.5	digits	0.95	gene model 412, (NCBI)
244049	chr07	Gm489		1.5	bonemarrow	0.98	gene model 489, (NCBI)
210541	chr07	Gm581					gene model 581, (NCBI)
235634	chr09	Gm590					gene model 590, (NCBI)
269401	chr02	Gm632					gene model 632, (NCBI)
271944	chr03	Gm659					gene model 659, (NCBI)
277432	chr02	Gm691	*	8	preoptic	1.72	gene model 691, (NCBI)
332427	chr01	Gm776		1.4	B220+ B-cells	0.96	gene model 776, (NCBI)
328320	chr13	Gm807					gene model 807, (NCBI)
329305	chr01	Gm821					gene model 821, (NCBI)
332942	chr04	Gm853		3.9	kidney	0.96	gene model 853, (NCBI)
380702	chr11	Gm879	*	1.2	pancreas	0.98	gene model 879, (NCBI)
225518	chr18	Gm92		3.4	umbilical cord	0.94	gene model 92, (NCBI)
381229	chr19	Gm969					gene model 969, (NCBI)
14674	chr11	Gna13		3	thymus	0.77	guanine nucleotide binding protein, alpha 13
14680	chr18	Gnal	*	61.2	medial olfactory epithelium	1.27	guanine nucleotide binding protein, alpha stimulating, olfactory type
14683	chr02	Gnas	*	4.1	pituitary	1.61	GNAS (guanine nucleotide binding protein, alpha stimulating) complex locus
14686	chr03	Gnat2		40.8	retina	1.04	guanine nucleotide binding protein, alpha transducing 2
14708	chr10	Gng7		79.5	dorsal striatum	42.35	guanine nucleotide binding protein (G protein), gamma 7 subunit
14710	chr11	Gngt2		22.5	B220+ B-cells	0.87	guanine nucleotide binding protein (G protein), gamma transducing activity polypeptide 2
432486	chr10	Gnptab					N-acetylglucosamine-1-phosphate transferase, alpha and beta subunits
14732	chr19	Gpam					glycerol-3-phosphate acyltransferase, mitochondrial
66614	chr03	Gpatc4		30.5	blastocysts	0.98	G patch domain containing 4
14751	chr07	Gpi1		4.4	skeletal muscle	2.18	glucose phosphate isomerase 1
14756	chr13	Gpld1		9.3	preoptic	1.58	glycosylphosphatidylinositol specific phospholipase D1
224792	chr17	Gpr116		180.9	lung	1	G protein-coupled receptor 116
14738	chr05	Gpr12	*	1.8	vomeralnasal organ	1	G-protein coupled receptor 12
243277	chr05	Gpr133		7.3	bladder	0.92	G protein-coupled receptor 133
80290	chr05	Gpr146		2.6	liver	0.94	G protein-coupled receptor 146
229357	chr03	Gpr149	*	21.6	oocyte	0.96	G protein-coupled receptor 149
240239	chr18	Gpr151		1.7	pancreas	0.99	G protein-coupled receptor 151
240888	chr01	Gpr161		1.8	blastocysts	0.98	G protein-coupled receptor 161
77106	chr17	Gpr178		8	dorsal striatum	3.63	G protein-coupled receptor 178
76854	chr05	Gpr30		3.6	pituitary	1.07	G protein-coupled receptor 30
171469	chr01	Gpr37l1		254.1	cerebellum	68.85	G protein-coupled receptor 37-like 1
14766	chr08	Gpr56		4.5	preoptic	1.41	G protein-coupled receptor 56
140741	chr10	Gpr6	*	1.4	cerebral cortex	1.39	G protein-coupled receptor 6
238377	chr12	Gpr68		25.1	CD8+T-cells	1.68	G protein-coupled receptor 68
64450	chr06	Gpr85		13.8	hypothalamus	10.67	G protein-coupled receptor 85
84111	chr03	Gpr87		37.7	tongue	1.06	G protein-coupled receptor 87
70355	chr11	Gprc5c	*	3.9	cerebellum	0.95	G protein-coupled receptor, family C, group 5, member C
76282	chr15	Gpt1		51.5	liver	1.1	glutamic pyruvic transaminase 1, soluble
14775	chr09	Gpx1		6	kidney	0.28	glutathione peroxidase 1
52857	chr07	Gramd1a		25.1	CD8+T-cells	2.39	GRAM domain containing 1A
56149	chr15	Grasp		8.4	amygdala	7.74	GRP1 (general receptor for phosphoinositides 1)-associated scaffold protein
195733	chr12	Grhl1		83	digits	1.13	grainyhead-like 1 (Drosophila)
14803	chr14	Grid1	*	2.1	substantia nigra	1.09	glutamate receptor, ionotropic, delta 1
110637	chr09	Grik4	*	3.6	dorsal root ganglia	1.11	glutamate receptor, ionotropic, kainate 4
14809	chr07	Grik5		27.4	cerebral cortex	27.37	glutamate receptor, ionotropic, kainate 5 (gamma 2)
14811	chr16	Grin2a	*	1.7	embryo day 7.5	1.02	glutamate receptor, ionotropic, NMDA2A (epsilon 1)
14812	chr06	Grin2b	*	3.6	olfactory bulb	1.34	glutamate receptor, ionotropic, NMDA2B (epsilon 2)
74053	chr10	Grip1		35.4	fertilized egg	2.31	glutamate receptor interacting protein 1
225642	chr18	Grp	*	49	amygdala	1.62	gastrin releasing peptide
14836	chr12	Gsc	*	1.3	bonemarrow	0.98	goosecoid
57911	chr11	Gsdm1		13.6	digits	0.96	gasdermin 1
14854	chr02	Gss		41.5	kidney	0.84	glutathione synthetase
14870	chr19	Gstp1					glutathione S-transferase, pi 1
14869	chr19	Gstp2		12.1	liver	1.3	glutathione S-transferase, pi 2
107459	chr16	Gt4-1		1.8	pancreas	0.96	gene trap insertion site 4-1
227835	chr02	Gtdc1		7.1	oocyte	3.02	glycosyltransferase-like domain containing 1
23894	chr13	Gtf2h2		8.6	oocyte	0.95	general transcription factor II H, polypeptide 2
17263	chr12	Gtl2		121.2	hypothalamus	48.7	GTL2, imprinted maternally expressed untranslated mRNA
74770	chr09	Gup1		56.2	skeletal muscle	2.05	Gup1, glycerol uptake/transporter homolog (yeast)
74558	chr07	Gvin1		18.1	adipose tissue	0.69	GTPase, very large interferon inducible 1
71683	chr18	Gypc		18.9	bone	0.78	glycophorin C
14955	chr07	H19		445.2	umbilical cord	0.7	H19 fetal liver mRNA
15007	chr17	H2-Q10		503.3	liver	0.91	histocompatibility 2, Q region locus 10
110557	chr17	H2-Q6					histocompatibility 2, Q region locus 6
15018	chr17	H2-Q7		69.6	CD8+T-cells	0.77	histocompatibility 2, Q region locus 7
15019	chr17	H2-Q8		24.6	lymphnode	1	histocompatibility 2, Q region locus 8
15114	chr11	Hap1		329.7	preoptic	18.2	huntingtin-associated protein 1
15116	chr17	Has1		1.7	thyroid	0.92	hyaluronan synthase1
15132	chr07	Hbb-bh1		1716.2	embryo day 8.5	0.98	hemoglobin Z, beta-like embryonic chain
67933	chr10	Hcfc2		13.3	testis	1.28	host cell factor C2
15184	chr11	Hdac5		7.6	olfactory bulb	3.45	histone deacetylase 5
56233	chr15	Hdac7a		8.8	thymus	0.92	histone deacetylase 7A
15186	chr02	Hdc		32.4	ovary	0.91	histidine decarboxylase
76987	chr18	Hdhd2		6.3	hypothalamus	2.78	haloacid dehalogenase-like hydrolase domain containing 2
77446	chr16	Heg1		16.9	lung	0.6	HEG homolog 1 (zebrafish)
53417	chr07	Hif3a		1.4	placenta	0.98	hypoxia inducible factor 3, alpha subunit
54388	chr11	Hils1		338.8	testis	0.96	histone H1-like protein in spermatids 1
327655	chr02	Hisppd2a					histidine acid phosphatase domain containing 2A
212032	chr13	Hk3					hexokinase 3
217082	chr11	Hlf	*				hepatic leukemia factor
235106	chr09	Hnt		10.7	cerebellum	7.02	neurotrimin
239099	chr14	Homez		15.4	testis	0.96	homeodomain leucine zipper-encoding gene
15423	chr15	Hoxc4	*	2.9	pancreas	0.63	homeo box C4
15444	chr04	Hpca		444.6	hippocampus	199.43	hippocalcin
15476	chr05	Hs3st1		10.3	cerebellum	1.02	heparan sulfate (glucosamine) 3-O-sulfotransferase 1
195646	chr07	Hs3st2	*	12.9	dorsal root ganglia	9.21	heparan sulfate (glucosamine) 3-O-sulfotransferase 2
15478	chr11	Hs3st3a1	*	4.2	umbilical cord	0.98	heparan sulfate (glucosamine) 3-O-sulfotransferase 3A1
15483	chr01	Hsd11b1		36.4	liver	0.91	hydroxysteroid 11-beta dehydrogenase 1
15484	chr08	Hsd11b2	*	397.7	uterus	0.99	hydroxysteroid 11-beta dehydrogenase 2
15497	chr03	Hsd3b6					hydroxysteroid dehydrogenase-6, delta<5>-3-beta
74377	chr17	Hsf2bp		1.8	blastocysts	0.99	heat shock transcription factor 2 binding protein
26386	chr08	Hsf4	*	5.4	preoptic	1.67	heat shock transcription factor 4
15481	chr09	Hspa8					heat shock protein 8
56534	chr13	Hspb3	*	5.7	skeletal muscle	1.37	heat shock protein 3
15552	chr04	Htr1d	*	3.3	dorsal root ganglia	1.36	5-hydroxytryptamine (serotonin) receptor 1D
15561	chr09	Htr3a		50.8	trigeminal	1.36	5-hydroxytryptamine (serotonin) receptor 3A
15562	chr18	Htr4	*	1.4	salivary gland	0.96	5 hydroxytryptamine (serotonin) receptor 4
56213	chr07	Htra1	*	11.1	umbilical cord	2.61	HtrA serine peptidase 1
330723	chr08	Htra4	*	30.7	digits	1.16	HtrA serine peptidase 4
15586	chr09	Hyal1		2.1	lung	0.81	hyaluronoglucosaminidase 1
68572	chr11	Ict1		3.3	thymus	1	immature colon carcinoma transcript 1
170718	chr02	Idh3b		5.2	heart	1.29	isocitrate dehydrogenase 3 (NAD+) beta
15937	chr17	Ier3		36.6	uterus	1.23	immediate early response 3
226695	chr01	Ifi205		74.7	adipose tissue	0.47	interferon activated gene 205
66141	chr07	Ifitm3		16.7	uterus	0.31	interferon induced transmembrane protein 3
15976	chr16	Ifnar2		12.9	CD4+T-cells	0.94	interferon (alpha and beta) receptor 2
319146	chr04	Ifnz		1.3	pancreas	0.99	interferon zeta
12589	chr05	Ift81		15.9	medial olfactory epithelium	2.42	intraflagellar transport 81 homolog (Chlamydomonas)
16000	chr10	Igf1	*	11.2	liver	0.7	insulin-like growth factor 1
16001	chr07	Igf1r	*				insulin-like growth factor I receptor
16002	chr07	Igf2	*	169.3	umbilical cord	2.21	insulin-like growth factor 2
16006	chr11	Igfbp1		42.8	liver	1.2	insulin-like growth factor binding protein 1
16008	chr01	Igfbp2		141.3	bladder	3.07	insulin-like growth factor binding protein 2
207683	chr16	Igsf11		3.1	kidney	0.97	immunoglobulin superfamily, member 11
78908	chr03	Igsf3		11.5	oocyte	0.95	immunoglobulin superfamily, member 3
76500	chr09	Ihpk2		11.7	medial olfactory epithelium	0.92	inositol hexaphosphate kinase 2
16150	chr08	Ikbkb		7.8	CD8+T-cells	0.55	inhibitor of kappaB kinase beta
16157	chr04	Il11ra1		7.9	snout epidermis	0.83	interleukin 11 receptor, alpha chain 1
16159	chr03	Il12a		5.8	B220+ B-cells	1.25	interleukin 12a
56069	chr18	Il17b		1.5	medial olfactory epithelium	0.98	interleukin 17B
239114	chr14	Il17d		2.1	umbilical cord	1.61	interleukin 17D
16172	chr06	Il17ra	*	15	CD8+T-cells	0.86	interleukin 17 receptor A
171463	chr14	Il17rd		1.4	oocyte	0.97	interleukin 17 receptor D
16068	chr07	Il18bp		9	lymphnode	0.91	interleukin 18 binding protein
16181	chr02	Il1rn		5.1	tongue	0.92	interleukin 1 receptor antagonist
83430	chr10	Il23a		1.5	small intestine	0.97	interleukin 23, alpha subunit p19
50931	chr08	Il27ra	*	81.2	CD4+T-cells	0.96	interleukin 27 receptor, alpha
218624	chr13	Il31ra		40.6	oocyte	0.96	interleukin 31 receptor A
114663	chr18	Impa2					inositol (myo)-1(or 4)-monophosphatase 2
224224	chr16	Impg2		30	retina	0.96	interphotoreceptor matrix proteoglycan 2
16323	chr13	Inhba		8.3	placenta	0.98	inhibin beta-A
16326	chr10	Inhbe		1.4	pancreas	1.01	inhibin beta E
269180	chr01	Inpp4a	*	3.1	cerebellum	1.06	inositol polyphosphate-4-phosphatase, type I
212111	chr07	Inpp5a		14	cerebellum	1	inositol polyphosphate-5-phosphatase A
16336	chr08	Insl3	*				insulin-like 3
23920	chr03	Insrr		1.7	salivary gland	0.81	insulin receptor-related receptor
67320	chr09	Iqcf4		255.1	testis	0.98	IQ motif containing F4
16364	chr13	Irf4	*	27.3	B220+ B-cells	0.97	interferon regulatory factor 4
15944	chr11	Irgm		12.8	B220+ B-cells	0.86	immunity-related GTPase family, M
319480	chr09	Itga11	*	2.8	pancreas	0.94	integrin, alpha 11
16402	chr15	Itga5		19.3	umbilical cord	0.96	integrin alpha 5 (fibronectin receptor alpha)
16404	chr10	Itga7	*	8.6	dorsal root ganglia	0.92	integrin alpha 7
104099	chr09	Itga9		6.9	adrenalgland	0.98	integrin alpha 9
16407	chr11	Itgae		15.8	testis	0.89	integrin, alpha E, epithelial-associated
16414	chr10	Itgb2		94.4	CD4+T-cells	0.88	integrin beta 2
16416	chr11	Itgb3	*	5	placenta	0.88	integrin beta 3
16426	chr14	Itih3		412.8	preoptic	3.75	inter-alpha trypsin inhibitor, heavy chain 3
209378	chr02	Itih5		19	umbilical cord	0.9	inter-alpha (globulin) inhibitor H5
76071	chr05	Jakmip1					janus kinase and microtubule interacting protein 1
81703	chr12	Jundm2	*	5.3	umbilical cord	3.18	Jun dimerization protein 2
545156	chr16	Kalrn		5.9	oocyte	1.87	kalirin, RhoGEF kinase
74901	chr08	Kbtbd11		3	CD4+T-cells	1.34	kelch repeat and BTB (POZ) domain containing 11
208439	chr12	Kbtbd9		1.4	dorsal striatum	1	kelch repeat and BTB (POZ) domain containing 9
16491	chr03	Kcna3	*	10.6	thymus	0.99	potassium voltage-gated channel, shaker-related subfamily, member 3
16492	chr02	Kcna4		4.3	olfactory bulb	1.07	potassium voltage-gated channel, shaker-related subfamily, member 4
16493	chr06	Kcna5	*	40	medial olfactory epithelium	1.52	potassium voltage-gated channel, shaker-related subfamily, member 5
16494	chr06	Kcna6	*	11.8	thyroid	1.25	potassium voltage-gated channel, shaker-related, subfamily, member 6
16497	chr03	Kcnab1	*	161.7	dorsal striatum	63.8	potassium voltage-gated channel, shaker-related subfamily, beta member 1
99738	chr03	Kcnc4	*	21.4	medial olfactory epithelium	2.49	potassium voltage gated channel, Shaw-related subfamily, member 4
246133	chr16	Kcne2		123.5	stomach	0.99	potassium voltage-gated channel, Isk-related subfamily, gene 2
57442	chr07	Kcne3	*	10.6	large intestine	1.05	potassium voltage-gated channel, Isk-related subfamily, gene 3
57814	chr01	Kcne4		4.4	umbilical cord	1.02	potassium voltage-gated channel, Isk-related subfamily, gene 4
225030	chr17	Kcng3	*	1.3	brown fat	0.97	potassium voltage-gated channel, subfamily G, member 3
16511	chr05	Kcnh2	*	27.2	pituitary	1.07	potassium voltage-gated channel, subfamily H (eag-related), member 2
238271	chr12	Kcnh5	*	1.7	pancreas	1.15	potassium voltage-gated channel, subfamily H (eag-related), member 5
192775	chr11	Kcnh6		4.6	embryo day 6.5	0.92	potassium voltage-gated channel, subfamily H (eag-related), member 6
80906	chr19	Kcnip2		12.6	olfactory bulb	4.94	Kv channel-interacting protein 2
56461	chr02	Kcnip3					Kv channel interacting protein 3, calsenilin
16513	chr01	Kcnj10	*	62.7	spinal cord lower	5.72	potassium inwardly-rectifying channel, subfamily J, member 10
16514	chr07	Kcnj11	*	1.5	heart	0.93	potassium inwardly rectifying channel, subfamily J, member 11
16521	chr09	Kcnj5	*	4.3	medial olfactory epithelium	1.08	potassium inwardly-rectifying channel, subfamily J, member 5
16524	chr01	Kcnj9		16.6	cerebellum	9.82	potassium inwardly-rectifying channel, subfamily J, member 9
16528	chr19	Kcnk4	*	1.1	pancreas	0.99	potassium channel, subfamily K, member 4
16530	chr19	Kcnk7		5.3	digits	1.05	potassium channel, subfamily K, member 7
16531	chr14	Kcnma1	*	11.9	hippocampus	8.94	potassium large conductance calcium-activated channel, subfamily M, alpha member 1
16533	chr11	Kcnmb1		25.3	dorsal root ganglia	0.97	potassium large conductance calcium-activated channel, subfamily M, beta member 1
140493	chr03	Kcnn3	*	1.6	spleen	0.94	potassium intermediate/small conductance calcium-activated channel, subfamily N, member 3
16534	chr07	Kcnn4		43.4	salivary gland	0.82	potassium intermediate/small conductance calcium-activated channel, subfamily N, member 4
16536	chr02	Kcnq2	*	11.3	hippocampus	4.34	potassium voltage-gated channel, subfamily Q, member 2
243043	chr05	Kctd8	*	20	dorsal root ganglia	1.52	potassium channel tetramerisation domain containing 8
13992	chr15	Khdrbs3	*	9.2	hippocampus	8.93	KH domain containing, RNA binding, signal transduction associated 3
381293	chr01	Kif14		1.5	pancreas	0.95	kinesin family member 14
16599	chr05	Klf3		8.6	digits	0.36	Kruppel-like factor 3 (basic)
71778	chr05	Klhl5		5.1	lung	1.01	kelch-like 5 (Drosophila)
246293	chr05	Klhl8		148	oocyte	1.84	kelch-like 8 (Drosophila)
13646	chr07	Klk1b22					kallikrein 1-related peptidase b22
16660	chr11	Krt1-1		261.7	digits	0.97	keratin complex 1, acidic, gene 1
16661	chr11	Krt1-10		796.8	digits	1.42	keratin complex 1, acidic, gene 10
16669	chr11	Krt1-19		1923.6	large intestine	0.9	keratin complex 1, acidic, gene 19
94179	chr11	Krt1-23		130.1	tongue	0.84	keratin complex 1, acidic, gene 23
107656	chr11	Krt1-9					keratin complex 1, acidic, gene 9
16678	chr15	Krt2-1		1771.4	digits	0.95	keratin complex 2, basic, gene 1
110308	chr15	Krt2-5		605.2	digits	1.06	keratin complex 2, basic, gene 5
110310	chr15	Krt2-7		450.5	bladder	0.79	keratin complex 2, basic, gene 7
16691	chr15	Krt2-8		915.6	blastocysts	0.5	keratin complex 2, basic, gene 8
23927	chr16	Krtap14		347.9	snout epidermis	1.01	keratin associated protein 14
64661	chr07	Krtdap		2674.5	digits	0.94	keratinocyte differentiation associated protein
333050	chr05	Ksr2		1.6	pancreas	0.98	kinase suppressor of ras 2
16770	chr15	Lalba		250.2	mammary gland (lact)	0.98	lactalbumin, alpha
16780	chr01	Lamb3		21.4	snout epidermis	0.82	laminin, beta 3
66988	chr05	Lap3		10.8	small intestine	0.68	leucine aminopeptidase 3
16792	chr04	Laptm5		22.3	lymphnode	1.23	lysosomal-associated protein transmembrane 5
76893	chr03	Lass2		7.8	blastocysts	0.51	longevity assurance homolog 2 (S. cerevisiae)
244864	chr09	Layn		1.8	bonemarrow	0.91	layilin
320429	chr09	Lba1		19.7	amygdala	8.23	lupus brain antigen 1
16816	chr08	Lcat		69.9	liver	2.34	lecithin cholesterol acyltransferase
18826	chr14	Lcp1		35.8	B220+ B-cells	0.3	lymphocyte cytosolic protein 1
106557	chr17	Ldhal6b		72.3	testis	0.98	lactate dehydrogenase A-like 6B
320202	chr01	Lefty2		1.6	embryo day 7.5	0.98	Left-right determination factor 2
19039	chr11	Lgals3bp		31	adipose tissue	0.51	lectin, galactoside-binding, soluble, 3 binding protein
16859	chr11	Lgals9		24.7	liver	0.27	lectin, galactose binding, soluble 9
56839	chr19	Lgi1		43.4	amygdala	4.72	leucine-rich repeat LGI family, member 1
329252	chr01	Lgr6	*	3.3	trachea	1	leucine-rich repeat-containing G protein-coupled receptor 6
16880	chr15	Lifr		3	placenta	0.99	leukemia inhibitory factor receptor
65970	chr15	Lima1		7.5	blastocysts	0.46	LIM domain and actin binding 1
16891	chr18	Lipg	*	8.6	placenta	0.97	lipase, endothelial
16909	chr02	Lmo2	*	19.3	B220+ B-cells	0.91	LIM domain only 2
16911	chr03	Lmo4		6	cerebral cortex	6.02	LIM domain only 4
380928	chr14	Lmo7		7.9	lung	0.96	LIM domain only 7
16917	chr02	Lmx1b	*	1.8	thyroid	0.97	LIM homeobox transcription factor 1 beta
140887	chr05	Lnx2		5.9	oocyte	0.77	ligand of numb-protein X 2
193574	chr14	LOC193574					similar to T-cell receptor alpha chain V region CTL-L17 precursor
194960	chr11	LOC194960					similar to ribosomal protein L27
232875	chr07	LOC232875					similar to hypothetical protein FLJ12895
236451	chr14	LOC236451		7.5	B220+ B-cells	0.93	similar to PHD finger protein 11
240549	chr19	LOC240549					similar to arylacetyl acyl-CoA N-acyltransferase
241051	chr01	LOC241051		1.2	pancreas	0.98	similar to PHD finger protein 19
244958	chr09	LOC244958		2	pancreas	0.98	similar to Protein C6orf117
270335	chr07	LOC270335					hypothetical gene supported by BC019681%3B BC027236
330776	chr08	LOC330776		1.3	mammary gland (lact)	1	hypothetical gene supported by AK085556
381417	chr02	LOC381417					similar to solute carrier family 28 (sodium-coupled nucleoside transporter), member 2
382884	chr14	LOC382884					similar to BWK-1
383103	chr16	LOC383103					similar to RIKEN cDNA 1810036I24
383613	chr01	LOC383613					similar to suppressor of initiator codon mutations, related sequence 1
384179	chr05	LOC384179		2.4	spleen	0.94	similar to ribosomal protein L15
432611	chr11	LOC432611					similar to dynein, axonemal, intermediate polypeptide 2
432823	chr17	LOC432823					similar to hypothetical protein MGC37588
433144	chr17	LOC433144					similar to thioredoxin-related transmembrane protein 2
433158	chr18	LOC433158					similar to src homology collagen protein 66 kDa isoform
433208	chr18	LOC433208		2.1	stomach	1.04	hypothetical LOC433208
433297	chr01	LOC433297		5.6	bladder	0.83	similar to myosin, light polypeptide 6, alkali, smooth muscle and non-muscle
433482	chr02	LOC433482					hypothetical gene supported by BC028556
433614	chr03	LOC433614					similar to zinc finger, BED domain containing 4
433632	chr03	LOC433632					hypothetical LOC433632
433658	chr03	LOC433658					hypothetical gene supported by AK035802
433706	chr04	LOC433706					similar to 60S ribosomal protein L29
433762	chr04	LOC433762		19.7	prostate	1.65	similar to Retrovirus-related POL polyprotein (Endonuclease)
433961	chr05	LOC433961					similar to Ral guanine nucleotide dissociation stimulator (RalGEF) (RalGDS)
433968	chr05	LOC433968					similar to Nucleoside diphosphate kinase B (NDK B) (NDP kinase B) (nm23-M2) (P18)
434008	chr06	LOC434008		1.4	salivary gland	1.04	similar to hypothetical protein MGC33926
434179	chr07	LOC434179					hypothetical LOC434179
434228	chr07	LOC434228		1.6	stomach	0.99	hypothetical gene supported by AK035124
434279	chr08	LOC434279		1.6	thyroid	0.98	hypothetical gene supported by AK053768
434401	chr09	LOC434401					similar to Nhp2 non-histone chromosome protein 2-like 1
434404	chr09	LOC434404					similar to 40S ribosomal protein S6
434428	chr09	LOC434428					similar to tubulin, alpha 2%3B tubulin alpha 2
434484	chr01	LOC434484					similar to SP140 nuclear body protein%3B nuclear body protein Sp140
434510	chr09	LOC434510					hypothetical LOC434510
434635	chr09	LOC434635					similar to mastermind-like 2%3B mastermind (Drosophila)-like 2
435392	chr14	LOC435392		3.2	CD4+T-cells	1.1	similar to ribosomal protein L31
436081	chr09	LOC436081					similar to ribosomal protein L36
544835	chr12	LOC544835					hypothetical LOC544835
544903	chr12	LOC544903					similar to immunoglobulin mu-chain
545007	chr14	LOC545007					hypothetical protein LOC545007
545043	chr14	LOC545043					similar to zinc finger, BED domain containing 4
545332	chr01	LOC545332					similar to ubiquitin-conjugating enzyme E2 variant 1
545339	chr09	LOC545339					similar to SP140 nuclear body protein (predicted)
545471	chr02	LOC545471					similar to KRAB zinc finger protein 6D
545578	chr03	LOC545578					similar to Ubiquitin-conjugating enzyme E2 L3 (Ubiquitin-protein ligase L3) (UbcM4)
545645	chr04	LOC545645					similar to interferon zeta
545646	chr04	LOC545646					similar to interferon zeta
545674	chr04	LOC545674		1.2	bonemarrow	0.99	similar to RP11-506B15.1 protein isoform 1
545861	chr06	LOC545861					similar to empty spiracles homolog 1
545929	chr07	LOC545929					similar to serine/threonine kinase
546020	chr07	LOC546020					similar to Mucin-5AC (Mucin 5 subtype AC, tracheobronchial) (Tracheobronchial mucin) (TBM)
546101	chr08	LOC546101					similar to myosin, light polypeptide 6, alkali, smooth muscle and non-muscle
546663	chr16	LOC546663					similar to ribosomal protein S21
546729	chr19	LOC546729					similar to Protein FAM26C
546801	chr03	LOC546801		1.4	pancreas	0.97	similar to ets variant gene 3
546842	chr04	LOC546842		1.7	stomach	0.98	similar to cytochrome P450, family 4, subfamily a, polypeptide 14
547328	chr14	LOC547328					similar to TRAV8-2
619724	chr06	LOC619724					hypothetical LOC619724
619759	chr02	LOC619759					similar to mitochondrial ribosomal protein S18B
619945	chr05	LOC619945					hypothetical protein LOC619945
620078	chr01	LOC620078					similar to SP140 nuclear body protein (predicted)
620119	chr14	LOC620119		3.9	B220+ B-cells	0.65	similar to Histone H3.3
620468	chr13	LOC620468					hypothetical LOC620468
620551	chr05	LOC620551					similar to PRAME family member DJ1198H6.2
620639	chr05	LOC620639					similar to PRAME family member DJ1198H6.2
620648	chr13	LOC620648					similar to Proteolipid protein 2
620649	chr01	LOC620649					hypothetical LOC620649
620689	chr01	LOC620689					hypothetical LOC620689
621388	chr03	LOC621388					hypothetical LOC621388
621697	chr10	LOC621697					similar to 60S ribosomal protein L32
621953	chr13	LOC621953					hypothetical LOC621953
621976	chr13	LOC621976					similar to CG12341-PA
622138	chr02	LOC622138					hypothetical LOC622138
622268	chr18	LOC622268					similar to mitochondrial ribosomal protein L27
622306	chr05	LOC622306					similar to Ral guanine nucleotide dissociation stimulator (RalGEF) (RalGDS)
622345	chr02	LOC622345		1.5	CD8+T-cells	1	similar to hemicentin 1
622629	chr10	LOC622629					hypothetical LOC622629
622635	chr04	LOC622635					similar to Basic salivary proline-rich protein 4 allele L (Salivary proline-rich protein Po) (Parotid o protein)
622645	chr17	LOC622645		1.6	salivary gland	0.98	similar to KIAA1913
622719	chr05	LOC622719					similar to PRAME family member DJ1198H6.2
622731	chr05	LOC622731					similar to PRAME family member DJ1198H6.2
622744	chr05	LOC622744					similar to PRAME family member DJ1198H6.2
622782	chr14	LOC622782		11.8	heart	0.68	hypothetical LOC622782
623169	chr17	LOC623169					similar to 40S ribosomal protein S17
623503	chr01	LOC623503		2.3	snout epidermis	1.02	similar to prolactin releasing hormone
623505	chr13	LOC623505					similar to ribosomal protein S18
623516	chr13	LOC623516					hypothetical LOC623516
623592	chr14	LOC623592					hypothetical LOC623592
623818	chr01	LOC623818					similar to hydroxymethylbilane synthase
623911	chr09	LOC623911					similar to Zinc finger protein 660
624049	chr05	LOC624049					similar to PRAME family member DJ1198H6.2
624074	chr01	LOC624074					similar to component of Sp100-rs
624180	chr13	LOC624180					similar to Protein C1orf43 (Hepatitis C virus NS5A-transactivated protein 4) (Protein NICE-3) (S863-3)
624224	chr05	LOC624224					similar to Usher syndrome type III A
624713	chr03	LOC624713		2.7	embryo day 6.5	0.93	similar to large subunit ribosomal protein L36a
624784	chr10	LOC624784					similar to G/T mismatch-specific thymine DNA glycosylase (C-JUN leucine zipper interactive protein JZA-3)
624831	chr05	LOC624831					hypothetical LOC624831
624845	chr10	LOC624845					similar to EC1-V2R pheromone receptor
625055	chr03	LOC625055					similar to 40S ribosomal protein S2
625237	chr12	LOC625237					hypothetical LOC625237
625276	chr15	LOC625276					hypothetical LOC625276
625835	chr16	LOC625835		1.8	bladder	0.85	similar to ribosomal protein S18
625917	chr19	LOC625917		2.7	bladder	1.12	similar to ribosomal protein L31
625997	chr18	LOC625997					similar to signal transducer and activator of transcription interacting protein 1
626416	chr09	LOC626416					similar to doublecortin and CaM kinase-like 3
626571	chr11	LOC626571					similar to CG15429-PA
626593	chr07	LOC626593					similar to zinc finger protein 124
627009	chr04	LOC627009		37.3	oocyte	1.08	similar to PRAME family member 9
627273	chr14	LOC627273					similar to T-cell receptor alpha chain V region CTL-L17 precursor
627302	chr02	LOC627302					hypothetical protein LOC627302
627525	chr02	LOC627525					similar to protein tyrosine phosphatase, receptor type, J
627662	chr10	LOC627662					similar to DUF729 domain containing 1
627858	chr01	LOC627858					similar to CG6114-PA
627998	chr01	LOC627998		2.8	placenta	0.95	similar to ATP synthase, H+ transporting, mitochondrial F0 complex, subunit G
628081	chr12	LOC628081					hypothetical LOC628081
628323	chr11	LOC628323					similar to ribosomal protein S27a
628359	chr07	LOC628359		3.8	pancreas	1.42	similar to zinc finger protein 135 (clone pHZ-17)
628475	chr07	LOC628475					similar to serine/threonine kinase
628664	chr07	LOC628664					similar to serine/threonine kinase
628747	chr17	LOC628747					similar to mitochondrial ribosomal protein L45
628900	chr12	LOC628900					similar to serine (or cysteine) peptidase inhibitor, clade A, member 3H
628962	chr14	LOC628962					similar to 40S ribosomal protein S2
629575	chr14	LOC629575					similar to 40S ribosomal protein S6
629605	chr12	LOC629605					hypothetical protein LOC629605
629699	chr12	LOC629699					similar to formin 3 CG33556-PA
630061	chr14	LOC630061					similar to T-cell receptor alpha chain V region CTL-L17 precursor
630579	chr13	LOC630579					similar to zinc finger protein 124
630612	chr13	LOC630612					similar to ribosomal protein S18
630757	chr13	LOC630757					similar to Nhp2 non-histone chromosome protein 2-like 1
631797	chr15	LOC631797					similar to otoferlin isoform a
632687	chr11	LOC632687					hypothetical protein LOC632686
632802	chr01	LOC632802					similar to centrin 4
633971	chr10	LOC633971					hypothetical LOC633971
634650	chr05	LOC634650					similar to macrophage activation 2
635169	chr04	LOC635169					hypothetical LOC635169
635539	chr10	LOC635539					hypothetical LOC635539
637557	chr11	LOC637557					similar to Amiloride-sensitive cation channel 1, neuronal (Amiloride-sensitive brain sodium channel 2)
637748	chr18	LOC637748					similar to ribosomal protein L21
637776	chr07	LOC637776					similar to zinc finger protein 124
637809	chr17	LOC637809					similar to HBS1-like protein
637868	chr13	LOC637868					hypothetical LOC637868
638532	chr01	LOC638532					similar to biogenesis of lysosome-related organelles complex-1, subunit 2
639387	chr16	LOC639387					hypothetical LOC639387
639653	chr18	LOC639653					hypothetical protein LOC639653
639655	chr14	LOC639655					hypothetical LOC639655
640234	chr18	LOC640234					similar to Nucleophosmin (NPM) (Nucleolar phosphoprotein B23) (Numatrin) (Nucleolar protein NO38)
640799	chr09	LOC640799					similar to ankyrin repeat domain 26
641366	chr01	LOC641366					hypothetical ENV polyprotein
664847	chr18	LOC664847					similar to lipoxygenase homology domains 1
664887	chr07	LOC664887					similar to paired-Ig-like receptor A6 isoform a
664921	chr17	LOC664921					hypothetical protein LOC664921
664929	chr14	LOC664929					hypothetical protein LOC664929
665000	chr13	LOC665000					similar to spermine synthase
665011	chr04	LOC665011					hypothetical protein LOC665011
665031	chr05	LOC665031					similar to PRAME family member DJ1198H6.2
665097	chr15	LOC665097					hypothetical protein LOC665097
665272	chr01	LOC665272					similar to smoothelin-like 1
665273	chr11	LOC665273					hypothetical protein LOC665273
665286	chr09	LOC665286					hypothetical protein LOC665286
665317	chr01	LOC665317					similar to component of Sp100-rs
665338	chr01	LOC665338					similar to component of Sp100-rs
665408	chr01	LOC665408					similar to SP140 nuclear body protein (predicted)
665423	chr09	LOC665423					hypothetical protein LOC665423
665503	chr13	LOC665503					similar to Protein C1orf43 (Hepatitis C virus NS5A-transactivated protein 4) (Protein NICE-3) (S863-3)
665512	chr11	LOC665512					similar to Rho GTPase activating protein 21
665578	chr08	LOC665578					hypothetical protein LOC665578
665607	chr05	LOC665607					hypothetical protein LOC665607
665668	chr04	LOC665668					hypothetical protein LOC665668
665756	chr08	LOC665756					hypothetical protein LOC665756
665787	chr08	LOC665787					hypothetical protein LOC665787
665814	chr04	LOC665814					similar to RIKEN cDNA 1700008B15 gene
665837	chr16	LOC665837					hypothetical protein LOC665837
665877	chr02	LOC665877					hypothetical protein LOC665877
665880	chr17	LOC665880					hypothetical protein LOC665880
665885	chr06	LOC665885					hypothetical protein LOC665885
665898	chr04	LOC665898					hypothetical protein LOC665898
665899	chr06	LOC665899					hypothetical protein LOC665899
665937	chr17	LOC665937					similar to Ferritin light chain 1 (Ferritin L subunit 1)
665982	chr16	LOC665982					hypothetical protein LOC665982
665993	chr04	LOC665993					hypothetical protein LOC665993
666017	chr10	LOC666017					hypothetical protein LOC666017
666039	chr09	LOC666039					hypothetical protein LOC666039
666048	chr04	LOC666048					similar to C05G5.5
666090	chr08	LOC666090					hypothetical protein LOC666090
666117	chr01	LOC666117					hypothetical protein LOC666117
666169	chr05	LOC666169					similar to PRAME family member DJ1198H6.2
666190	chr09	LOC666190					hypothetical protein LOC666190
666200	chr01	LOC666200					hypothetical protein LOC666200
666209	chr05	LOC666209					similar to PRAME family member DJ1198H6.2
666257	chr09	LOC666257					hypothetical protein LOC666257
666263	chr13	LOC666263					hypothetical protein LOC666263
666266	chr05	LOC666266					hypothetical protein LOC666266
666356	chr12	LOC666356					hypothetical protein LOC666356
666385	chr12	LOC666385					hypothetical protein LOC666385
666435	chr13	LOC666435					hypothetical protein LOC666435
666451	chr14	LOC666451					hypothetical protein LOC666451
666464	chr04	LOC666464					hypothetical protein LOC666464
666513	chr04	LOC666513					similar to Yamaguchi sarcoma viral (v-yes-1) oncogene homolog
666562	chr03	LOC666562					hypothetical protein LOC666562
666583	chr01	LOC666583					hypothetical protein LOC666583
666586	chr04	LOC666586					similar to ubiquitin A-52 residue ribosomal protein fusion product 1
666606	chr08	LOC666606					similar to neuregulin 1 isoform GGF2
666649	chr01	LOC666649					hypothetical protein LOC666649
666668	chr17	LOC666668					similar to 40S ribosomal protein S2
666705	chr13	LOC666705					similar to gonadotropin inducible ovarian transcription factor 1
666757	chr01	LOC666757					hypothetical protein LOC666757
666773	chr16	LOC666773					hypothetical protein LOC666773
666796	chr15	LOC666796					hypothetical protein LOC666796
666852	chr15	LOC666852					hypothetical protein LOC666852
666904	chr10	LOC666904					similar to heat shock protein 8
666910	chr11	LOC666910					hypothetical protein LOC666910
666920	chr04	LOC666920					hypothetical protein LOC666920
666927	chr04	LOC666927					similar to palmitoyl-protein thioesterase-like protein
666934	chr15	LOC666934					hypothetical protein LOC666934
666955	chr12	LOC666955					hypothetical protein LOC666955
667045	chr10	LOC667045					similar to Protein FAM54A (DUF729 domain containing protein 1)
667050	chr05	LOC667050					similar to zinc finger protein 498
667054	chr14	LOC667054					similar to IgE-binding protein
667063	chr04	LOC667063					hypothetical protein LOC667063
667124	chr12	LOC667124					hypothetical protein LOC667124
667214	chr11	LOC667214					similar to immunity-related GTPase family, cinema 1
667228	chr10	LOC667228					hypothetical protein LOC667228
667229	chr13	LOC667229					hypothetical protein LOC667229
667363	chr13	LOC667363					hypothetical protein LOC667363
667376	chr17	LOC667376					hypothetical protein LOC667376
667479	chr10	LOC667479					hypothetical protein LOC667479
667508	chr13	LOC667508					hypothetical protein LOC667508
667520	chr13	LOC667520					hypothetical protein LOC667520
667553	chr14	LOC667553					similar to T-cell receptor alpha chain V region CTL-L17 precursor
667561	chr01	LOC667561					hypothetical protein LOC667561
667567	chr14	LOC667567					similar to T-cell receptor alpha chain V region CTL-L17 precursor
667596	chr14	LOC667596					hypothetical protein LOC667596
667627	chr03	LOC667627					hypothetical protein LOC667627
667631	chr11	LOC667631					similar to Protein C10orf70
667635	chr14	LOC667635					similar to T-cell receptor alpha chain V region CTL-L17 precursor
667666	chr04	LOC667666					similar to reduced expression 2
667708	chr17	LOC667708					hypothetical protein LOC667708
667744	chr09	LOC667744					similar to myosin, light polypeptide 6, alkali, smooth muscle and non-muscle
667770	chr16	LOC667770					similar to downregulated in ovarian cancer 1 isoform 2
667795	chr01	LOC667795					similar to CG13876-PA
668009	chr02	LOC668009					similar to zinc finger protein 97
668078	chr03	LOC668078					hypothetical protein LOC668078
668084	chr12	LOC668084					hypothetical protein LOC668084
668122	chr07	LOC668122					similar to very large inducible GTPase 1 isoform A
668158	chr12	LOC668158					similar to CG17265-PA
668163	chr01	LOC668163					hypothetical protein LOC668163
668175	chr07	LOC668175					hypothetical protein LOC668175
668212	chr12	LOC668212					similar to RIKEN cDNA C920006C10
668241	chr07	LOC668241					similar to CG7971-PC, isoform C
668253	chr14	LOC668253					hypothetical protein LOC668253
668284	chr08	LOC668284					hypothetical protein LOC668284
668306	chr14	LOC668306					hypothetical protein LOC668306
668334	chr12	LOC668334					hypothetical protein LOC668334
668335	chr17	LOC668335					hypothetical protein LOC668335
668435	chr12	LOC668435					phosphoglycerate kinase 1-like
668449	chr07	LOC668449					hypothetical protein LOC668449
668514	chr12	LOC668514					hypothetical protein LOC668514
668518	chr12	LOC668518					hypothetical protein LOC668518
668520	chr03	LOC668520					hypothetical protein LOC668520
668524	chr12	LOC668524					hypothetical protein LOC668524
668550	chr14	LOC668550					hypothetical protein LOC668550
668587	chr03	LOC668587					hypothetical protein LOC668587
668608	chr19	LOC668608					hypothetical protein LOC668608
668620	chr07	LOC668620					similar to gonadotropin inducible ovarian transcription factor 2
668759	chr03	LOC668759					hypothetical protein LOC668759
668809	chr03	LOC668809					similar to ribosomal protein S23
668830	chr17	LOC668830					similar to Nuclear transport factor 2 (NTF-2)
668927	chr02	LOC668927					similar to Glyceraldehyde-3-phosphate dehydrogenase (GAPDH)
668935	chr02	LOC668935					similar to 60S ribosomal protein L37a
668936	chr02	LOC668936					similar to 60S ribosomal protein L5
381338	chr01	Lonrf2		76.4	preoptic	16.7	LON peptidase N-terminal domain and ring finger 2
16948	chr18	Lox	*	1041.9	umbilical cord	0.82	lysyl oxidase
99633	chr03	Lphn2		2.6	epidermis	2.42	latrophilin 2
64898	chr17	Lpin2		15	oocyte	1.45	lipin 2
210126	chr16	Lpp		25.6	bladder	0.4	LIM domain containing preferred translocation partner in lipoma
380916	chr14	Lrch1		2.8	thymus	0.92	leucine-rich repeats and calponin homology (CH) domain containing 1
231798	chr05	Lrch4		2.4	lymphnode	0.94	leucine-rich repeats and calponin homology (CH) domain containing 4
320398	chr10	Lrig3		7.1	large intestine	0.94	leucine-rich repeats and immunoglobulin-like domains 3
54562	chr15	Lrrc6		51.6	testis	1	leucine rich repeat containing 6 (testis)
242274	chr03	Lrrc7	*	2.5	olfactory bulb	1.31	leucine rich repeat containing 7
16978	chr01	Lrrfip1		8.6	skeletal muscle	1.38	leucine rich repeat (in FLII) interacting protein 1
71268	chr09	Lrrfip2		5.3	oocyte	1.03	leucine rich repeat (in FLII) interacting protein 2
241846	chr02	Lsm14b		7.2	oocyte	1.09	LSM14 homolog B (SCD6, S. cerevisiae)
78651	chr08	Lsm6		2.2	preoptic	0.95	LSM6 homolog, U6 small nuclear RNA associated (S. cerevisiae)
16985	chr07	Lsp1		36.1	B220+ B-cells	0.75	lymphocyte specific 1
16992	chr17	Lta	*	5.8	B220+ B-cells	0.97	lymphotoxin A
93840	chr01	Ltap		3.6	embryo day 10.5	1.01	loop tail associated protein
17001	chr11	Ltc4s		11.6	adipose tissue	0.97	leukotriene C4 synthase
17071	chr15	Ly6f		103.2	salivary gland	0.87	lymphocyte antigen 6 complex, locus F
70274	chr17	Ly6g6e		10.1	tongue	0.97	lymphocyte antigen 6 complex, locus G6E
23936	chr15	Lynx1		16.3	dorsal root ganglia	12.5	Ly6/neurotoxin 1
17116	chr03	Mab21l1	*	11.4	retina	0.96	mab-21-like 1 (C. elegans)
23937	chr03	Mab21l2	*	3.9	retina	0.89	mab-21-like 2 (C. elegans)
11426	chr04	Macf1		5.9	lung	1.07	microtubule-actin crosslinking factor 1
17136	chr07	Mag		64.7	spinal cord upper	7.58	myelin-associated glycoprotein
99470	chr03	Magi3		8.8	dorsal root ganglia	0.91	membrane associated guanylate kinase, WW and PDZ domain containing 3
320772	chr12	Mamdc1	*	2.1	embryo day 6.5	1.08	MAM domain containing 1
71738	chr19	Mamdc2		27.3	lung	0.98	MAM domain containing 2
17155	chr10	Man1a	*	24.1	B220+ B-cells	0.86	mannosidase 1, alpha
26403	chr19	Map3k11		2.2	snout epidermis	0.72	mitogen activated protein kinase kinase kinase 11
69546	chr07	Mapk1ip1		4.7	preoptic	0.9	mitogen activated protein kinase 1 interacting protein 1
26417	chr07	Mapk3		10.9	dorsal root ganglia	1.47	mitogen activated protein kinase 3
225724	chr18	Mapk4		10.4	medial olfactory epithelium	6.97	mitogen-activated protein kinase 4
17762	chr11	Mapt	*	82.9	preoptic	67.75	microtubule-associated protein tau
320253	chr18	March3		1.4	embryo day 6.5	0.98	membrane-associated ring finger (C3HC4) 3
223455	chr15	March6		3.5	oocyte	2.48	membrane-associated ring finger (C3HC4) 6
17357	chr04	Marcksl1		21.4	embryo day 10.5	1.54	MARCKS-like 1
17171	chr17	Mas1		6.6	amygdala	3.14	MAS1 oncogene
110789	chr13	Mass1		2.8	retina	1.04	monogenic, audiogenic seizure susceptibility 1
17183	chr02	Matn4	*	8	lung	1.03	matrilin 4
56758	chr03	Mbnl1		5.4	CD8+T-cells	0.83	muscleblind-like 1 (Drosophila)
17196	chr18	Mbp	*	187	spinal cord upper	66.57	myelin basic protein
17207	chr08	Mcf2l		29.3	medial olfactory epithelium	6.06	mcf.2 transforming sequence-like
171166	chr03	Mcoln3		8.4	vomeralnasal organ	0.89	mucolipin 3
17227	chr14	Mcpt4		2.5	snout epidermis	0.72	mast cell protease 4
17232	chr14	Mcpt9		2.3	bonemarrow	0.97	mast cell protease 9
74762	chr17	Mdga1	*	1.5	epidermis	0.94	MAM domain containing glycosylphosphatidylinositol anchor 1
17449	chr11	Mdh1		8.5	olfactory bulb	7.52	malate dehydrogenase 1, NAD (soluble)
17242	chr02	Mdk		109.4	embryo day 9.5	1.12	midkine
17251	chr03	Mds1	*	2.7	bladder	0.94	myelodysplasia syndrome 1 homolog (human)
67219	chr04	Med18		1.9	bonemarrow	0.93	mediator of RNA polymerase II transcription, subunit 18 homolog (yeast)
75613	chr07	Med25		3.8	embryo day 9.5	0.93	mediator of RNA polymerase II transcription, subunit 25 homolog (yeast)
67381	chr14	Med4		12.9	oocyte	0.92	mediator of RNA polymerase II transcription, subunit 4 homolog (yeast)
80509	chr04	Med8		2.3	digits	0.54	mediator of RNA polymerase II transcription, subunit 8 homolog (yeast)
230971	chr04	Megf6		5	pancreas	0.93	multiple EGF-like-domains 6
17294	chr06	Mest		63.6	embryo day 9.5	1.2	mesoderm specific transcript
17299	chr10	Mettl1		2.1	embryo day 6.5	0.71	methyltransferase-like 1
70152	chr15	Mettl7a		41.7	lung	0.4	methyltransferase like 7A
17305	chr15	Mfng		13.1	adipose tissue	0.92	manic fringe homolog (Drosophila)
268510	chr11	Mgat5b		11.2	dorsal striatum	8.79	mannoside acetylglucosaminyltransferase 5, isoenzyme B
434402	chr09	MGC5739		1012.6	testis	0.97	similar to hypothetical protein FLJ20010
277333	chr01	MGC68323		5.4	skeletal muscle	1.29	glyceraldehyde-3-phosphate dehydrogenase (phosphorylating)-like
574403	chr11	MGC99845					hypothetical protein LOC574403
23945	chr06	Mgll	*	20.7	snout epidermis	3.88	monoglyceride lipase
171580	chr10	Mical1		40.8	B220+ B-cells	0.8	microtubule associated monoxygenase, calponin and LIM domain containing 1
17339	chr10	Mip		644.2	retina	0.97	major intrinsic protein of eye lens fiber
27217	chr01	Mixl1	*	1.4	embryo day 7.5	0.98	Mix1 homeobox-like 1 (Xenopus laevis)
102423	chr09	Mizf		1.4	bonemarrow	1	MBD2-interacting zinc finger
17345	chr07	Mki67		72.8	bone	0.55	antigen identified by monoclonal antibody Ki 67
223701	chr15	Mkl1					MKL (megakaryoblastic leukemia)/myocardin-like 1
214162	chr09	Mll1		4.1	preoptic	0.97	myeloid/lymphoid or mixed-lineage leukemia 1
17354	chr02	Mllt10		31.1	oocyte	0.78	myeloid/lymphoid or mixed lineage-leukemia translocation to 10 homolog (Drosophila)
17386	chr09	Mmp13		431.3	bone	0.97	matrix metallopeptidase 13
17391	chr02	Mmp24	*	56.5	cerebellum	2.68	matrix metallopeptidase 24
118453	chr11	Mmp28	*	3.5	pancreas	0.98	matrix metallopeptidase 28 (epilysin)
17395	chr02	Mmp9	*	87.4	bone	0.95	matrix metallopeptidase 9
68473	chr05	Mobkl1a		6.3	oocyte	0.95	MOB1, Mps One Binder kinase activator-like 1A (yeast)
17523	chr11	Mpo		900.8	bone	0.96	myeloperoxidase
50997	chr11	Mpp2		7.7	olfactory bulb	1.48	membrane protein, palmitoylated 2 (MAGUK p55 subfamily member 2)
227157	chr01	Mpp4		202.4	retina	0.96	membrane protein, palmitoylated 4 (MAGUK p55 subfamily member 4)
223726	chr15	Mpped1		108.1	cerebral cortex	108.12	metallophosphoesterase domain containing 1
17532	chr09	Mras	*	9.3	blastocysts	2.46	muscle and microspikes RAS
17533	chr02	Mrc1		23.2	umbilical cord	0.75	mannose receptor, C type 1
94063	chr19	Mrpl16		2.7	heart	1.22	mitochondrial ribosomal protein L16
19935	chr07	Mrpl23		2.6	skeletal muscle	0.82	mitochondrial ribosomal protein L23
27393	chr16	Mrpl39		1.8	spinal cord lower	1.03	mitochondrial ribosomal protein L39
17540	chr07	Mrvi1		25.8	uterus	0.94	MRV integration site 1
110265	chr14	Msra		24.8	kidney	1.17	methionine sulfoxide reductase A
320183	chr10	Msrb3	*	5.9	umbilical cord	0.71	methionine sulfoxide reductase B3
116871	chr17	Mta3		8.2	oocyte	0.82	metastasis associated 3
50994	chr07	Mtag2		1.2	pancreas	0.98	metastasis associated gene 2
270685	chr10	Mthfd1l		7.8	embryo day 8.5	0.77	methylenetetrahydrofolate dehydrogenase (NADP+ dependent) 1-like
102103	chr08	Mtus1		7.8	oocyte	0.56	mitochondrial tumor suppressor 1
17122	chr05	Mxd4	*	5.9	testis	0.98	Max dimerization protein 4
74761	chr04	Mxra8	*	27.9	lung	0.56	matrix-remodelling associated 8
17869	chr15	Myc		18.8	embryo day 6.5	0.39	myelocytomatosis oncogene
17884	chr11	Myh4		4552.9	skeletal muscle	2.9	myosin, heavy polypeptide 4, skeletal muscle
140781	chr14	Myh7		23.7	skeletal muscle	1.21	myosin, heavy polypeptide 7, cardiac muscle, beta
17897	chr09	Myl3		2201.5	heart	0.93	myosin, light polypeptide 3
17904	chr10	Myl6					myosin, light polypeptide 6, alkali, smooth muscle and non-muscle
17898	chr11	Myl7	*	789.6	heart	0.98	myosin, light polypeptide 7, regulatory
228785	chr02	Mylk2		72.5	skeletal muscle	0.97	myosin, light polypeptide kinase 2, skeletal muscle
217328	chr11	Myo15b		64.2	large intestine	1	myosin XVB
432516	chr10	Myo1a		441	small intestine	0.98	myosin IA
17912	chr01	Myo1b		72.5	lung	1.21	myosin IB
246177	chr11	Myo1g		103.2	B220+ B-cells	0.94	myosin IG
17933	chr12	Myt1l		21.1	amygdala	12.55	myelin transcription factor 1-like
230085	chr04	N28178	*	111.5	dorsal root ganglia	18.38	expressed sequence N28178
83564	chr07	Nalp4c		6	oocyte	0.98	NACHT, leucine rich repeat and PYD containing 4C
58243	chr06	Nap1l5		306.1	hypothalamus	55.36	nucleosome assembly protein 1-like 5
17957	chr02	Napb					N-ethylmaleimide sensitive fusion protein attachment protein beta
108123	chr18	Napg		5.4	amygdala	3.6	N-ethylmaleimide sensitive fusion protein attachment protein gamma
67563	chr17	Narfl		2.9	blastocysts	1.18	nuclear prelamin A recognition factor-like
17962	chr08	Nat3		1.5	pancreas	0.97	N-acetyltransferase 3
66176	chr11	Nat9		8.9	testis	0.89	NAT9
215690	chr01	Nav1	*	1.5	placenta	0.94	neuron navigator 1
235627	chr09	Nbeal2		1.6	CD8+T-cells	0.97	neurobeachin-like 2
17974	chr01	Nck2		5	thymus	1.26	non-catalytic region of tyrosine kinase adaptor protein 2
103425	chr10	Ncln		4.7	bone	0.72	nicalin homolog (zebrafish)
17977	chr12	Ncoa1		3.5	medial olfactory epithelium	1.66	nuclear receptor coactivator 1
27057	chr14	Ncoa4		6.8	prostate	0.64	nuclear receptor coactivator 4
20602	chr05	Ncor2		4.9	olfactory bulb	2.49	nuclear receptor co-repressor 2
29811	chr14	Ndrg2		18.1	skeletal muscle	6.9	N-myc downstream regulated gene 2
234593	chr08	Ndrg4		101.5	olfactory bulb	83.88	N-myc downstream regulated gene 4
15531	chr18	Ndst1		7.3	lung	1.18	N-deacetylase/N-sulfotransferase (heparan glucosaminyl) 1
17423	chr14	Ndst2	*	3.1	B220+ B-cells	0.73	N-deacetylase/N-sulfotransferase (heparan glucosaminyl) 2
67273	chr01	Ndufa10		5.7	brown fat	1.75	NADH dehydrogenase (ubiquinone) 1 alpha subcomplex 10
69875	chr17	Ndufa11					NADH dehydrogenase (ubiquinone) 1 alpha subcomplex 11
67130	chr15	Ndufa6		3.3	heart	1	NADH dehydrogenase (ubiquinone) 1 alpha subcomplex, 6 (B14)
66416	chr17	Ndufa7		4.8	heart	0.92	NADH dehydrogenase (ubiquinone) 1 alpha subcomplex, 7 (B14.5a)
74103	chr02	Nebl	*	6.9	heart	1.49	nebulette
83814	chr18	Nedd4l					neural precursor cell expressed, developmentally down-regulated gene 4-like
18003	chr13	Nedd9		14.3	B220+ B-cells	0.55	neural precursor cell expressed, developmentally down-regulated gene 9
18008	chr03	Nes	*	26.1	embryo day 10.5	0.94	nestin
23956	chr01	Neu2		7.2	epidermis	1.03	neuraminidase 2
18011	chr19	Neurl		38.8	cerebral cortex	38.8	neuralized-like homolog (Drosophila)
11922	chr06	Neurod6		80.4	hippocampus	42.95	neurogenic differentiation 6
18019	chr02	Nfatc2	*	1.8	liver	1	nuclear factor of activated T-cells, cytoplasmic, calcineurin-dependent 2
18027	chr04	Nfia		4.7	cerebellum	1.24	nuclear factor I/A
18032	chr08	Nfix	*	11.5	snout epidermis	2.71	nuclear factor I/X
18038	chr17	Nfkbil1		1.5	placenta	0.97	nuclear factor of kappa light polypeptide gene enhancer in B-cells inhibitor-like 1
53972	chr01	Ngef	*	115.1	cerebral cortex	115.14	neuronal guanine nucleotide exchange factor
215819	chr10	Nhsl1		9.3	oocyte	0.58	NHS-like 1
18080	chr12	Nin	*	23.3	oocyte	1.13	ninein
29862	chr06	Ninj2		55.4	oocyte	1	ninjurin 2
20232	chr05	Nkx1-1		1.1	pancreas	0.99	NK1 transcription factor related, locus 1 (Drosophila)
20231	chr07	Nkx1-2	*	1.9	spleen	0.97	NK1 transcription factor related, locus 2 (Drosophila)
18095	chr14	Nkx3-1	*	262.8	prostate	1.11	NK-3 transcription factor, locus 1 (Drosophila)
18111	chr02	Nnat		155.3	pituitary	7.72	neuronatin
18113	chr09	Nnmt		81.2	adipose tissue	0.87	nicotinamide N-methyltransferase
18126	chr11	Nos2		1.4	placenta	0.99	nitric oxide synthase 2, inducible, macrophage
18129	chr03	Notch2		1.4	pancreas	0.98	Notch gene homolog 2 (Drosophila)
223473	chr15	Npal2		3.3	bonemarrow	0.88	NIPA-like domain containing 2
230899	chr04	Nppa		421.9	heart	0.97	natriuretic peptide precursor type A
18164	chr11	Nptx1	*	33.7	cerebellum	8.61	neuronal pentraxin 1
22259	chr02	Nr1h3		5.5	adipose tissue	0.87	nuclear receptor subfamily 1, group H, member 3
13864	chr08	Nr2f6		9.9	bladder	1.81	nuclear receptor subfamily 2, group F, member 6
15370	chr15	Nr4a1		30.4	adrenalgland	8.47	nuclear receptor subfamily 4, group A, member 1
18124	chr04	Nr4a3	*	1.5	pancreas	0.97	nuclear receptor subfamily 4, group A, member 3
26423	chr02	Nr5a1	*	193.7	adrenalgland	0.95	nuclear receptor subfamily 5, group A, member 1
18185	chr14	Nrl		1.2	fertilized egg	0.97	neural retina leucine zipper gene
18190	chr19	Nrxn2	*	29	cerebellum	17.46	neurexin II
107569	chr06	Nt5c3		7.4	bone	1.12	5'-nucleotidase, cytosolic III
269060	chr19	Nt5dc3		1.3	pancreas	0.98	5'-nucleotidase domain containing 3
103850	chr11	Nt5m		2.8	testis	1.74	5',3'-nucleotidase, mitochondrial
50767	chr08	Nte		2.7	preoptic	0.92	neuropathy target esterase
18208	chr11	Ntn1	*	2.2	pancreas	0.94	netrin 1
18211	chr03	Ntrk1		131.2	dorsal root ganglia	0.96	neurotrophic tyrosine kinase, receptor, type 1
18217	chr12	Ntsr2	*	277.1	preoptic	118.88	neurotensin receptor 2
74137	chr01	Nuak2	*	12.5	B220+ B-cells	0.67	NUAK family, SNF1-like kinase, 2
213484	chr14	Nudt18		42.6	testis	3.56	nudix (nucleoside diphosphate linked moiety X)-type motif 18
114643	chr05	Oas1c		263.7	oocyte	0.94	2'-5' oligoadenylate synthetase 1C
231699	chr05	Oas1e		211.7	fertilized egg	0.88	2'-5' oligoadenylate synthetase 1E
246729	chr05	Oas1h		137.3	oocyte	0.92	2'-5' oligoadenylate synthetase 1H
246728	chr05	Oas2		4.9	uterus	1.04	2'-5' oligoadenylate synthetase 2
70155	chr01	Ogfrl1		18.4	cerebellum	9.27	opioid growth factor receptor-like 1
18302	chr10	Oit3		4.2	liver	0.98	oncoprotein induced transcript 3
56177	chr02	Olfm1	*	69.6	amygdala	67.98	olfactomedin 1
380924	chr14	Olfm4					olfactomedin 4
404308	chr17	Olfr118					olfactory receptor 118
258397	chr02	Olfr1303					olfactory receptor 1303
258852	chr04	Olfr1341		1.6	thyroid	0.95	olfactory receptor 1341
269862	chr07	Olfr1349					olfactory receptor 1349
258527	chr13	Olfr1368		2.1	medial olfactory epithelium	0.96	olfactory receptor 1368
259041	chr01	Olfr1414		2.1	pancreas	1.05	olfactory receptor 1414
258227	chr19	Olfr1418					olfactory receptor 1418
57271	chr14	Olfr1509		11.5	medial olfactory epithelium	0.98	olfactory receptor 1509
29847	chr04	Olfr157		1.5	pancreas	1.05	olfactory receptor 157
18313	chr01	Olfr16		2	mammary gland (lact)	0.99	olfactory receptor 16
257962	chr11	Olfr222					olfactory receptor 222
257931	chr11	Olfr317					olfactory receptor 317
193053	chr11	Olfr386		1.6	spleen	0.96	olfactory receptor 386
258181	chr11	Olfr406		2.8	bonemarrow	0.96	olfactory receptor 406
258303	chr07	Olfr518		6	pancreas	0.95	olfactory receptor 518
258961	chr07	Olfr631		1.4	embryo day 10.5	1.01	olfactory receptor 631
259057	chr07	Olfr649		1.3	thyroid	1	olfactory receptor 649
259047	chr07	Olfr683		1.3	salivary gland	0.98	olfactory receptor 683
56860	chr07	Olfr690		1.2	salivary gland	0.98	olfactory receptor 690
259063	chr07	Olfr691		1.7	preoptic	1.34	olfactory receptor 691
258594	chr07	Olfr710		1.5	pancreas	0.97	olfactory receptor 710
404319	chr14	Olfr750		1.4	placenta	0.99	olfactory receptor 750
170639	chr07	Olfr78		263.2	umbilical cord	0.98	olfactory receptor 78
258672	chr10	Olfr825		1.9	pancreas	0.98	olfactory receptor 825
258671	chr10	Olfr826					olfactory receptor 826
18373	chr10	Olfr9		1.7	spleen	0.94	olfactory receptor 9
75475	chr15	Oplah		13.8	testis	0.96	5-oxoprolinase (ATP-hydrolysing)
13603	chr01	Opn3		3.4	oocyte	1.11	opsin (encephalopsin)
269120	chr01	Optc		12.6	bladder	0.94	opticin
74309	chr11	Osbp2	*	7.8	retina	1.32	oxysterol binding protein 2
64291	chr18	Osbpl1a		1.5	heart	1.01	oxysterol binding protein-like 1A
71720	chr06	Osbpl3					oxysterol binding protein-like 3
79196	chr07	Osbpl5	*	25.4	snout epidermis	0.97	oxysterol binding protein-like 5
18414	chr15	Osmr	*	36.7	lung	0.9	oncostatin M receptor
170711	chr07	Otud7		5.2	cerebellum	4.37	OTU domain containing 7
18423	chr11	Otx1	*	11.1	snout epidermis	1.03	orthodenticle homolog 1 (Drosophila)
170719	chr15	Oxr1		6.3	amygdala	5.19	oxidation resistance 1
18431	chr07	p		2.7	retina	0.91	pink-eyed dilution
18436	chr11	P2rx1		21.4	umbilical cord	0.97	purinergic receptor P2X, ligand-gated ion channel, 1
228139	chr02	P2rx3		12.5	dorsal root ganglia	0.95	purinergic receptor P2X, ligand-gated ion channel, 3
140795	chr03	P2ry14		72.9	uterus	0.92	purinergic receptor P2Y, G-protein coupled, 14
320452	chr07	P4ha3	*	9.7	umbilical cord	1.12	procollagen-proline, 2-oxoglutarate 4-dioxygenase (proline 4-hydroxylase), alpha polypeptide III
217893	chr12	Pacs2		6.6	spinal cord lower	1.19	phosphofurin acidic cluster sorting protein 2
214230	chr02	Pak6		3.2	snout epidermis	2.24	p21 (CDKN1A)-activated kinase 6
237504	chr10	Pamci		7.6	lung	0.88	peptidylglycine alpha-amidating monooxygenase COOH-terminal interactor
23850	chr01	Pappa2		75	placenta	0.99	pappalysin 2
76498	chr17	Paqr4	*	13	large intestine	5.64	progestin and adipoQ receptor family member IV
93737	chr18	Pard6g	*	12.4	digits	0.9	par-6 partitioning defective 6 homolog gamma (C. elegans)
381038	chr16	Parl		1.3	liver	1.04	presenilin associated, rhomboid-like
18507	chr04	Pax5	*	3.5	B220+ B-cells	0.96	paired box gene 5
18509	chr04	Pax7	*	1.6	lymphnode	0.96	paired box gene 7
18510	chr02	Pax8	*	5.4	kidney	0.98	paired box gene 8
18514	chr01	Pbx1		1.9	salivary gland	0.99	pre B-cell leukemia transcription factor 1
53601	chr18	Pcdh12		1.5	embryo day 6.5	0.99	protocadherin 12
211712	chr14	Pcdh9		37.8	substantia nigra	17.19	protocadherin 9
93875	chr18	Pcdhb4		1.4	retina	0.98	protocadherin beta 4
93877	chr18	Pcdhb6		1.4	thyroid	1.01	protocadherin beta 6
93708	chr18	Pcdhgc5					protocadherin gamma subfamily C, 5
66425	chr01	Pcp4l1		91.4	medial olfactory epithelium	6.5	Purkinje cell protein 4-like 1
18552	chr19	Pcsk5		23.2	small intestine	0.96	proprotein convertase subtilisin/kexin type 5
18559	chr11	Pctp		6.5	liver	1.07	phosphatidylcholine transfer protein
18574	chr15	Pde1b	*	32.7	dorsal striatum	14.04	phosphodiesterase 1B, Ca2+-calmodulin dependent
18575	chr06	Pde1c	*	2.4	testis	0.95	phosphodiesterase 1C
207728	chr07	Pde2a		50.7	amygdala	26.29	phosphodiesterase 2A, cGMP-stimulated
18578	chr04	Pde4b		9.7	B220+ B-cells	3.31	phosphodiesterase 4B, cAMP specific
18584	chr07	Pde8a	*	14.4	testis	0.84	phosphodiesterase 8A
56376	chr03	Pdlim5		88.6	skeletal muscle	0.84	PDZ and LIM domain 5
68559	chr02	Pdrg1		5	adrenalgland	0.8	p53 and DNA damage regulated 1
68070	chr15	Pdzd2		6.7	lung	0.94	PDZ domain containing 2
212684	chr19	Pdzd7	*	1.9	skeletal muscle	1.04	PDZ domain containing 7
55983	chr06	Pdzrn3	*	10.4	umbilical cord	1.66	PDZ domain containing RING finger 3
18613	chr11	Pecam1		37.7	lung	0.66	platelet/endothelial cell adhesion molecule 1
23986	chr13	Peci		8.1	liver	0.58	peroxisomal delta3, delta2-enoyl-Coenzyme A isomerase
18616	chr07	Peg3		92.5	umbilical cord	10.6	paternally expressed 3
105083	chr13	Pelo					pelota homolog (Drosophila)
18627	chr01	Per2	*	13.9	adrenalgland	2.29	period homolog 2 (Drosophila)
58869	chr03	Pex2		1.7	frontal cortex	1.52	peroxin 2
18640	chr01	Pfkfb2		21.9	retina	1.7	6-phosphofructo-2-kinase/fructose-2,6-biphosphatase 2
21946	chr07	Pglyrp1		241.1	bone	0.96	peptidoglycan recognition protein 1
215789	chr10	Phactr2		4.5	umbilical cord	0.94	phosphatase and actin regulator 2
54383	chr04	Phc2		13.8	fertilized egg	1.09	polyhomeotic-like 2 (Drosophila)
66190	chr07	Phca		11.7	retina	0.9	phytoceramidase, alkaline
269424	chr03	Phf17		6.2	placenta	0.79	PHD finger protein 17
228829	chr02	Phf20		4.7	oocyte	2.46	PHD finger protein 20
236539	chr03	Phgdh		6.2	pancreas	1.15	3-phosphoglycerate dehydrogenase
102693	chr09	Phldb1	*	6.5	substantia nigra	1	pleckstrin homology-like domain, family B, member 1
98432	chr01	Phlpp		7.2	substantia nigra	3.81	PH domain and leucine rich repeat protein phosphatase
11859	chr07	Phox2a	*	1.9	adrenalgland	0.99	paired-like homeobox 2a
18689	chr09	Phxr4		1.6	thymus	1	per-hexamer repeat gene 4
18690	chr07	Phxr5		2.3	dorsal root ganglia	0.82	per-hexamer repeat gene 5
239827	chr16	Pigz	*	9.1	blastocysts	0.97	phosphatidylinositol glycan, class Z
18720	chr03	Pip5k1b		3.4	hippocampus	1.62	phosphatidylinositol-4-phosphate 5-kinase, type 1 beta
18717	chr10	Pip5k1c		22.4	cerebellum	16.92	phosphatidylinositol-4-phosphate 5-kinase, type 1 gamma
18718	chr02	Pip5k2a		8.6	thymus	2.23	phosphatidylinositol-4-phosphate 5-kinase, type II, alpha
117150	chr10	Pip5k2c		3.7	blastocysts	1.99	phosphatidylinositol-4-phosphate 5-kinase, type II, gamma
18738	chr11	Pitpna					phosphatidylinositol transfer protein, alpha
18739	chr19	Pitpnm1	*	74.4	retina	26.09	phosphatidylinositol membrane-associated 1
19679	chr05	Pitpnm2		3.2	dorsal root ganglia	3.17	phosphatidylinositol transfer protein, membrane-associated 2
18781	chr04	Pla2g2c		8.4	testis	0.9	phospholipase A2, group IIC
26971	chr04	Pla2g2f		60.1	snout epidermis	0.95	phospholipase A2, group IIF
22634	chr10	Plagl1	*	49.5	umbilical cord	1	pleiomorphic adenoma gene-like 1
18796	chr02	Plcb2					phospholipase C, beta 2
18799	chr09	Plcd1	*	71.6	blastocysts	0.93	phospholipase C, delta 1
18457	chr02	Pldn		2	preoptic	1.11	pallidin
56193	chr11	Plek		45.1	bone	0.97	pleckstrin
83436	chr08	Plekha2		15.9	B220+ B-cells	0.84	pleckstrin homology domain-containing, family A (phosphoinositide binding specific) member 2
233765	chr07	Plekha7		4.9	placenta	1.13	pleckstrin homology domain containing, family A member 7
263406	chr12	Plekhg3	*	1.8	skeletal muscle	0.96	pleckstrin homology domain containing, family G (with RhoGef domain) member 3
18811	chr13	Plf		1223.3	placenta	0.94	proliferin
18817	chr07	Plk1		50.4	oocyte	0.92	polo-like kinase 1 (Drosophila)
72324	chr11	Plxdc1		24.9	cerebellum	4.98	plexin domain containing 1
18844	chr06	Plxna1	*	5.8	lung	1.5	plexin A1
140570	chr15	Plxnb2		4.9	medial olfactory epithelium	0.58	plexin B2
18858	chr11	Pmp22	*	65.4	trigeminal	0.79	peripheral myelin protein
56695	chr01	Pnkd		9.9	spinal cord lower	3.21	paroxysmal nonkinesiogenic dyskinesia
74414	chr03	Polr3c		5.4	B220+ B-cells	0.69	polymerase (RNA) III (DNA directed) polypeptide C
18979	chr06	Pon1		1210.3	liver	0.96	paraoxonase 1
50706	chr03	Postn		61.7	umbilical cord	0.08	periostin, osteoblast specific factor
18999	chr17	Pou5f1		24	embryo day 7.5	0.88	POU domain, class 5, transcription factor 1
19015	chr17	Ppard					peroxisome proliferator activator receptor delta
68507	chr01	Ppfia4		34.1	cerebellum	1.97	protein tyrosine phosphatase, receptor type, f polypeptide (PTPRF), interacting protein (liprin), alpha 4
56031	chr04	Ppie		7.4	B220+ B-cells	0.85	peptidylprolyl isomerase E (cyclophilin E)
66101	chr04	Ppih		1.6	CD4+T-cells	0.99	peptidyl prolyl isomerase H
19041	chr16	Ppl	*				periplakin
19043	chr17	Ppm1b		3.6	oocyte	1.36	protein phosphatase 1B, magnesium dependent, beta isoform
228852	chr02	Ppp1r16b	*	17.8	cerebellum	5.14	protein phosphatase 1, regulatory (inhibitor) subunit 16B
19049	chr11	Ppp1r1b	*	229.2	dorsal striatum	31.9	protein phosphatase 1, regulatory (inhibitor) subunit 1B
53412	chr19	Ppp1r3c		30.4	skeletal muscle	3.72	protein phosphatase 1, regulatory (inhibitor) subunit 3C
217124	chr11	Ppp1r9b		13.1	dorsal striatum	10.75	protein phosphatase 1, regulatory subunit 9B
19053	chr08	Ppp2cb		3	vomeralnasal organ	2.25	protein phosphatase 2 (formerly 2A), catalytic subunit, beta isoform
73699	chr09	Ppp2r1b		5.7	testis	0.72	protein phosphatase 2 (formerly 2A), regulatory subunit A (PR 65), beta isoform
21770	chr17	Ppp2r5d		2.9	preoptic	1.58	protein phosphatase 2, regulatory subunit B (B56), delta isoform
70351	chr17	Ppp4r1		4.7	blastocysts	0.58	protein phosphatase 4, regulatory subunit 1
320717	chr05	Pptc7		5.2	fertilized egg	1.3	PTC7 protein phosphatase homolog (S. cerevisiae)
114604	chr16	Prdm15		1.6	CD8+T-cells	0.97	PR domain containing 15
116847	chr01	Prelp		33.9	lung	0.49	proline arginine-rich end leucine-rich repeat
18749	chr03	Prkacb		8.3	preoptic	5.39	protein kinase, cAMP dependent, catalytic, beta
19088	chr12	Prkar2b	*	35.4	brown fat	3.25	protein kinase, cAMP dependent regulatory, type II beta
18753	chr14	Prkcd		8.2	dorsal root ganglia	0.26	protein kinase C, delta
18762	chr04	Prkcz		11.1	cerebellum	7.63	protein kinase C, zeta
66392	chr13	Prlpk		2538.5	placenta	0.97	prolactin-like protein K
71974	chr07	Prmt3		4.4	embryo day 6.5	0.58	protein arginine N-methyltransferase 3
19130	chr01	Prox1	*	6.1	liver	0.96	prospero-related homeobox 1
432763	chr13	Prr7		2.8	fertilized egg	0.99	proline rich 7 (synaptic)
70835	chr17	Prss22		3	umbilical cord	0.89	protease, serine, 22
328780	chr17	Prss34		40.8	bonemarrow	0.97	protease, serine, 34
19159	chr05	Pscd3		10.6	lung	0.95	pleckstrin homology, Sec7 and coiled-coil domains 3
73728	chr19	Psd	*	2	cerebral cortex	1.95	pleckstrin and Sec7 domain containing
74002	chr18	Psd2	*	109.9	cerebellum	2.92	pleckstrin and Sec7 domain containing 2
26439	chr07	Psg19		196.2	placenta	0.98	pregnancy specific glycoprotein 19
114868	chr07	Psg25		355.8	placenta	0.94	pregnancy-specific glycoprotein 25
19172	chr03	Psmb4		2.3	blastocysts	1.17	proteasome (prosome, macropain) subunit, beta type 4
66413	chr14	Psmd6		2.7	embryo day 6.5	0.86	proteasome (prosome, macropain) 26S subunit, non-ATPase, 6
19217	chr14	Ptger2	*	1.6	spleen	0.98	prostaglandin E receptor 2 (subtype EP2)
19221	chr03	Ptgfrn		18.5	umbilical cord	0.94	prostaglandin F2 receptor negative regulator
213527	chr01	Pthr2	*	1.5	thyroid	0.99	parathyroid hormone receptor 2
19231	chr01	Ptma		2.8	embryo day 9.5	0.61	prothymosin alpha
19245	chr15	Ptp4a3		1.6	dorsal striatum	1.24	protein tyrosine phosphatase 4a3
19253	chr01	Ptpn18	*	36.1	CD4+T-cells	0.74	protein tyrosine phosphatase, non-receptor type 18
24000	chr12	Ptpn21		51	oocyte	0.77	protein tyrosine phosphatase, non-receptor type 21
19270	chr14	Ptprg	*	2.4	lung	1.41	protein tyrosine phosphatase, receptor type, G
19274	chr17	Ptprm	*	13.3	lung	0.93	protein tyrosine phosphatase, receptor type, M
19279	chr10	Ptprr	*	34.6	oocyte	1.92	protein tyrosine phosphatase, receptor type, R
19290	chr18	Pura		5	substantia nigra	1.36	purine rich element binding protein A
19291	chr11	Purb		6.1	frontal cortex	4.06	purine rich element binding protein B
58235	chr09	Pvrl1	*	1.3	preoptic	1	poliovirus receptor-related 1
69675	chr12	Pxdn	*	11.4	umbilical cord	1.17	peroxidasin homolog (Drosophila)
19303	chr05	Pxn		3.4	blastocysts	0.3	paxillin
19309	chr19	Pygm		198.4	skeletal muscle	1.53	muscle glycogen phosphorylase
217212	chr11	Pyy	*	27.4	large intestine	0.97	peptide YY
71750	chr10	R3hdm2		4.2	olfactory bulb	2.26	R3H domain containing 2
75767	chr08	Rab11fip1		5.9	lung	0.89	RAB11 family interacting protein 1 (class I)
104886	chr12	Rab15	*	15.6	prostate	9.94	RAB15, member RAS oncogene family
58222	chr11	Rab37	*	5.6	CD4+T-cells	0.89	RAB37, member of RAS oncogene family
74760	chr19	Rab3il1	*	17.3	testis	0.93	RAB3A interacting protein (rabin3)-like 1
19349	chr06	Rab7		2.3	oocyte	1.27	RAB7, member RAS oncogene family
17274	chr08	Rab8a		1.7	thyroid	1.23	RAB8A, member RAS oncogene family
56187	chr14	Rabggta		2.1	B220+ B-cells	1.45	Rab geranylgeranyl transferase, a subunit
19352	chr03	Rabggtb		5.9	blastocysts	0.8	RAB geranylgeranyl transferase, b subunit
67042	chr15	Rabl4		1.8	testis	1.18	RAB, member of RAS oncogene family-like 4
26934	chr15	Racgap1		11.6	thymus	0.94	Rac GTPase-activating protein 1
19367	chr19	Rad9		3.1	B220+ B-cells	1.1	RAD9 homolog (S. pombe)
19377	chr11	Rai1		3.8	thymus	1.66	retinoic acid induced 1
19730	chr02	Ralgds		5	testis	1.42	ral guanine nucleotide dissociation stimulator
109905	chr03	Rap1a		3.2	thymus	0.65	RAS-related protein-1a
76108	chr14	Rap2a		4.6	amygdala	2.11	RAS related protein 2a
223864	chr15	Rapgef3	*	3.8	thymus	0.93	Rap guanine nucleotide exchange factor (GEF) 3
56508	chr02	Rapgef4	*	69.7	frontal cortex	48.67	Rap guanine nucleotide exchange factor (GEF) 4
19401	chr11	Rara		2.7	B220+ B-cells	0.9	retinoic acid receptor, alpha
218772	chr14	Rarb		10.9	dorsal striatum	3.31	retinoic acid receptor, beta
19411	chr15	Rarg		12	snout epidermis	0.65	retinoic acid receptor, gamma
19415	chr05	Rasal1	*	6.1	amygdala	4.49	RAS protein activator like 1 (GAP1 like)
70727	chr06	Rasgef1a		89.5	amygdala	66.15	RasGEF domain family, member 1A
74563	chr11	Rasgef1c	*	1.4	brown fat	1	RasGEF domain family, member 1C
19418	chr13	Rasgrf2	*	1.4	pancreas	0.98	RAS protein-specific guanine nucleotide-releasing factor 2
68939	chr05	Rasl11b		24.1	olfactory bulb	5.55	RAS-like, family 11, member B
215653	chr02	Rassf2	*	25.9	B220+ B-cells	1.21	Ras association (RalGDS/AF-6) domain family 2
54354	chr01	Rassf5	*	166.5	CD8+T-cells	1.51	Ras association (RalGDS/AF-6) domain family 5
19647	chr07	Rbbp6		2.4	cerebellum	1.31	retinoblastoma binding protein 6
109095	chr09	Rbm15b					RNA binding motif protein 15B
19653	chr19	Rbm4		4.8	thymus	0.48	RNA binding motif protein 4
207181	chr09	Rbms3		33.4	dorsal root ganglia	1	RNA binding motif, single stranded interacting protein
226594	chr01	Rcsd1	*	17.7	thymus	0.82	RCSD domain containing 1
19674	chr11	Rcvrn		493.1	retina	0.98	recoverin
68703	chr04	Rere		2.4	adipose tissue	1.14	arginine glutamic acid dipeptide (RE) repeats
67338	chr11	Rffl		12	testis	1.06	ring finger and FYVE like domain containing protein
19731	chr01	Rgl1	*	2.6	kidney	1.35	ral guanine nucleotide dissociation stimulator,-like 1
244058	chr07	Rgma	*	3.9	snout epidermis	1.63	RGM domain family, member A
68799	chr17	Rgmb	*	9.8	dorsal root ganglia	1.59	RGM domain family, member B
71729	chr05	Rgs12		8.7	olfactory bulb	1.79	regulator of G-protein signaling 12
50780	chr04	Rgs3		1.9	CD8+T-cells	0.96	regulator of G-protein signaling 3
58176	chr03	Rhbg	*	8.6	tongue	0.95	Rhesus blood group-associated B glycoprotein
246710	chr14	Rhobtb2		5.9	blastocysts	3.61	Rho-related BTB domain containing 2
237422	chr10	Ric8b		47.4	medial olfactory epithelium	1.35	resistance to inhibitors of cholinesterase 8 homolog B (C. elegans)
241770	chr02	Rims4	*				regulating synaptic membrane exocytosis 4
74030	chr02	Rin2		5.8	lung	0.94	Ras and Rab interactor 2
217835	chr12	Rin3		55.6	B220+ B-cells	0.81	Ras and Rab interactor 3
497106	chr14	Rnase12					ribonuclease, RNase A family, 12 (non-active)
497071	chr14	Rnase13					ribonuclease, RNase A family, 13 (non-active)
24014	chr01	Rnasel		1.3	spleen	0.97	ribonuclease L (2', 5'-oligoisoadenylate synthetase-dependent)
68195	chr17	Rnaset2		3.1	fertilized egg	1.01	ribonuclease T2
11858	chr11	Rnd2		18.4	substantia nigra	5.92	Rho family GTPase 2
68867	chr08	Rnf122		1.1	pancreas	0.98	ring finger protein 122
108089	chr12	Rnf144	*	6.4	B220+ B-cells	1.18	ring finger protein 144
330812	chr08	Rnf150	*	1.9	spleen	0.98	ring finger protein 150
320311	chr01	Rnf152	*	8.7	cerebellum	0.88	ring finger protein 152
71816	chr13	Rnf180					ring finger protein 180
108660	chr11	Rnf187		3.7	cerebral cortex	3.74	ring finger protein 187
76378	chr16	Ropn1		790.5	testis	0.99	ropporin, rhophilin associated protein 1
26564	chr13	Ror2	*	14.1	uterus	0.95	receptor tyrosine kinase-like orphan receptor 2
19883	chr09	Rora		57.9	digits	0.78	RAR-related orphan receptor alpha
19885	chr03	Rorc		1.5	thymus	1	RAR-related orphan receptor gamma
271209	chr14	Rp1hl1		53.6	retina	0.89	retinitis pigmentosa 1 homolog (human)-like 1
327860	chr11	RP23-280J3.2		3.2	retina	0.98	hypothetical protein A930010I02
68275	chr11	Rpa1		5	oocyte	0.62	replication protein A1
77945	chr14	Rpgrip1		6.2	retina	0.91	retinitis pigmentosa GTPase regulator interacting protein 1
66480	chr14	Rpl15		4.1	CD4+T-cells	0.71	ribosomal protein L15
19944	chr09	Rpl29					ribosomal protein L29
19951	chr06	Rpl32					ribosomal protein L32
27176	chr02	Rpl7a		2.4	CD8+T-cells	0.49	ribosomal protein L7a
245877	chr04	Rprc1					arginine/proline rich coiled-coil 1
67874	chr02	Rprm	*	21	amygdala	12.78	reprimo, TP53 dependent G2 arrest mediator candidate
20054	chr10	Rps15		3.4	CD4+T-cells	1.04	ribosomal protein S15
16898	chr17	Rps2		84.6	retina	0.97	ribosomal protein S2
66475	chr13	Rps23					ribosomal protein S23
20104	chr04	Rps6					ribosomal protein S6
73086	chr12	Rps6ka5		7.3	oocyte	1.19	ribosomal protein S6 kinase, polypeptide 5
238323	chr12	Rps6kl1	*	28.6	preoptic	12.81	ribosomal protein S6 kinase-like 1
76846	chr07	Rps9		5.7	embryo day 9.5	0.95	ribosomal protein S9
52187	chr04	Rragd	*	12.7	olfactory bulb	4.35	Ras-related GTP binding D
20130	chr07	Rras		19.6	umbilical cord	0.63	Harvey rat sarcoma oncogene, subgroup R
68750	chr13	Rreb1		3.8	blastocysts	0.4	ras responsive element binding protein 1
83434	chr07	Rshl1		8.9	testis	1.04	radial spokehead-like 1
66832	chr17	Rshl2		21.5	testis	0.84	radial spokehead-like 2
353326	chr12	Rtl1		1.2	spleen	0.99	retrotransposon-like 1
104001	chr12	Rtn1	*	350.8	cerebral cortex	350.81	reticulon 1
237847	chr11	Rtn4rl1	*	5.6	medial olfactory epithelium	2.83	reticulon 4 receptor-like 1
52822	chr05	Rufy3		380.2	trigeminal	78.08	RUN and FYVE domain containing 3
100213	chr04	Rusc2	*	11.1	lung	8.23	RUN and SH3 domain containing 2
20181	chr02	Rxra	*	5.3	liver	0.77	retinoid X receptor alpha
378700	chr02	Rya3		2092.7	medial olfactory epithelium	1	antimicrobial peptide RYA3
56353	chr06	Rybp		6.6	blastocysts	0.91	RING1 and YY1 binding protein
67860	chr03	S100a16		18.1	tongue	1.18	S100 calcium binding protein A16
20203	chr10	S100b		48.6	trigeminal	4.92	S100 protein, beta polypeptide, neural
217125	chr11	Samd14	*	7.8	dorsal root ganglia	1.16	sterile alpha motif domain containing 14
56214	chr10	Scamp4		2.3	medial olfactory epithelium	1.39	secretory carrier membrane protein 4
78473	chr11	Scap1		9.7	CD4+T-cells	0.92	src family associated phosphoprotein 1
219151	chr14	Scara3	*	4.7	digits	1.38	scavenger receptor class A, member 3
380713	chr11	Scarf1		2.6	lung	0.94	scavenger receptor class F, member 1
329065	chr19	Scd4					stearoyl-coenzyme A desaturase 4
68662	chr11	Scgb3a1		2523.8	trachea	1.07	secretoglobin, family 3A, member 1
268297	chr10	Scml4		4	CD8+T-cells	0.94	sex comb on midleg-like 4 (Drosophila)
24046	chr09	Scn11a		360.3	dorsal root ganglia	1.14	sodium channel, voltage-gated, type XI, alpha
72821	chr09	Scn2b		23.2	dorsal striatum	12.09	sodium channel, voltage-gated, type II, beta
20269	chr02	Scn3a					sodium channel, voltage-gated, type III, alpha
399548	chr09	Scn4b	*	4.4	skeletal muscle	1.04	sodium channel, type IV, beta
20271	chr09	Scn5a	*	5.1	heart	0.96	sodium channel, voltage-gated, type V, alpha
20278	chr07	Scnn1g	*	141.5	lung	0.97	sodium channel, nonvoltage-gated 1 gamma
20971	chr02	Sdc4		8.3	embryo day 6.5	0.99	syndecan 4
20324	chr01	Sdpr		124.3	lung	0.63	serum deprivation response
67815	chr11	Sec14l2	*	12.1	medial olfactory epithelium	0.98	SEC14-like 2 (S. cerevisiae)
380683	chr11	Sec14l3					SEC14-like 3 (S. cerevisiae)
20341	chr03	Selenbp1		491.7	large intestine	0.71	selenium binding protein 1
20342	chr03	Selenbp2					selenium binding protein 2
20353	chr01	Sema4c		4.3	placenta	0.82	sema domain, Ig domain, transmembrane domain (TM) and short cytoplasmic domain, 4C
20356	chr15	Sema5a	*	4.7	ovary	0.93	semaphorin 5A
20357	chr16	Sema5b	*	2.6	testis	1.01	semaphorin 5B
214968	chr02	Sema6d	*	12.3	substantia nigra	2.37	sema domain, transmembrane domain (TM), and cytoplasmic domain, (semaphorin) 6D
66315	chr16	Senp7		2.8	thymus	1.05	SUMO1/sentrin specific peptidase 7
18951	chr16	Sept5		68.4	cerebral cortex	68.41	septin 5
53860	chr11	Sept9		6.5	CD4+T-cells	1.05	septin 9
217847	chr12	Serpina10		3.2	liver	0.96	serine (or cysteine) peptidase inhibitor, clade A (alpha-1 antiproteinase, antitrypsin), member 10
20700	chr12	Serpina1a		1744	liver	0.93	serine (or cysteine) peptidase inhibitor, clade A, member 1a
380839	chr13	Serpinb1c					serine (or cysteine) peptidase inhibitor, clade B, member 1c
20723	chr13	Serpinb9		19	lung	0.65	serine (or cysteine) peptidase inhibitor, clade B, member 9
15160	chr16	Serpind1		27.6	liver	0.98	serine (or cysteine) peptidase inhibitor, clade D, member 1
20720	chr01	Serpine2	*	13.4	medial olfactory epithelium	3.07	serine (or cysteine) peptidase inhibitor, clade E, member 2
12406	chr07	Serpinh1		14.1	umbilical cord	0.23	serine (or cysteine) peptidase inhibitor, clade H, member 1
240427	chr18	Setbp1		1.6	embryo day 10.5	1.02	SET binding protein 1
52690	chr12	Setd3		2.2	preoptic	1.63	SET domain containing 3
20370	chr11	Sez6	*	19.3	olfactory bulb	4.32	seizure related gene 6
107701	chr03	Sf3b4		5	blastocysts	1.41	splicing factor 3b, subunit 4
78887	chr11	Sfi1	*	2	dorsal striatum	1.01	Sfi1 homolog, spindle assembly associated (yeast)
20319	chr03	Sfrp2	*	309.4	vomeralnasal organ	0.92	secreted frizzled-related protein 2
53609	chr07	Sfrs16		1.4	testis	0.98	splicing factor, arginine/serine-rich 16 (suppressor-of-white-apricot homolog, Drosophila)
20384	chr12	Sfrs5		2.7	thymus	0.85	splicing factor, arginine/serine-rich 5 (SRp40, HRS)
231769	chr05	Sfrs8		4.6	thymus	1.21	splicing factor, arginine/serine-rich 8
14057	chr13	Sfxn1		5.1	kidney	0.99	sideroflexin 1
73094	chr04	Sgip1	*	4	retina	1.21	SH3-domain GRB2-like (endophilin) interacting protein 1
218544	chr13	Sgtb		36.4	medial olfactory epithelium	22.55	small glutamine-rich tetratricopeptide repeat (TPR)-containing, beta
27387	chr02	Sh2d3c					SH2 domain containing 3C
328381	chr14	Sh2d4b		1.4	brown fat	0.98	SH2 domain containing 4B
230863	chr04	Sh2d5		38.5	dorsal striatum	18.71	SH2 domain containing 5
50795	chr16	Sh3bgr		86.9	skeletal muscle	0.86	SH3-binding domain glutamic acid-rich protein
98402	chr01	Sh3bp4		3.5	salivary gland	1.09	SH3-domain binding protein 4
27059	chr03	Sh3d19		7	epidermis	0.88	SH3 domain protein D19
235406	chr09	Sh3px3	*	1.6	tongue	0.94	SH3 and PX domain containing 3
269016	chr18	Sh3rf2		2.2	tongue	0.93	SH3 domain containing ring finger 2
24057	chr12	Sh3yl1		14.6	oocyte	1.22	Sh3 domain YSC-like 1
210274	chr07	Shank2		1.2	pancreas	1	SH3/ankyrin domain gene 2
230126	chr04	Shb		4.2	snout epidermis	0.66	src homology 2 domain-containing transforming protein B
214547	chr03	She	*	1.6	lung	0.96	src homology 2 domain-containing transforming protein E
24058	chr07	Sigirr		2.6	CD4+T-cells	0.73	single immunoglobulin and toll-interleukin 1 receptor (TIR) domain
20612	chr02	Siglec1		1.5	thyroid	0.97	sialic acid binding Ig-like lectin 1, sialoadhesin
233186	chr07	Siglecf		3.2	lung	0.91	sialic acid binding Ig-like lectin F
20461	chr02	Silg111		2.8	fertilized egg	1.08	silica-induced gene 111
20481	chr04	Ski		6.2	cerebellum	2.37	Sloan-Kettering viral oncogene homolog
75345	chr01	Slamf7		1.5	lymphnode	0.9	SLAM family member 7
74748	chr01	Slamf8		2.5	lymphnode	0.98	SLAM family member 8
98365	chr01	Slamf9		1.6	adrenalgland	1.01	SLAM family member 9
20495	chr02	Slc12a1		382.5	kidney	1	solute carrier family 12, member 1
20497	chr08	Slc12a3					solute carrier family 12, member 3
20498	chr08	Slc12a4		3.5	snout epidermis	0.59	solute carrier family 12, member 4
20499	chr13	Slc12a7		30.6	CD8+T-cells	0.43	solute carrier family 12, member 7
108052	chr18	Slc14a1		25	bladder	0.82	solute carrier family 14 (urea transporter), member 1
56643	chr14	Slc15a1		238	small intestine	0.91	solute carrier family 15 (oligopeptide transporter), member 1
65221	chr19	Slc15a3		9.4	lymphnode	0.96	solute carrier family 15, member 3
20511	chr02	Slc1a2	*	1.3	liver	1.21	solute carrier family 1 (glial high affinity glutamate transporter), member 2
20512	chr15	Slc1a3		114.6	cerebellum	38.46	solute carrier family 1 (glial high affinity glutamate transporter), member 3
20516	chr08	Slc20a2		5.3	tongue	1.24	solute carrier family 20, member 2
20521	chr19	Slc22a12		76.6	kidney	1.02	solute carrier family 22 (organic anion/cation transporter), member 12
18400	chr07	Slc22a18		139.8	kidney	1.02	solute carrier family 22 (organic cation transporter), member 18
19879	chr19	Slc22a8		5.7	kidney	1.17	solute carrier family 22 (organic anion transporter), member 8
22626	chr01	Slc23a3		18.1	placenta	1.07	solute carrier family 23 (nucleobase transporters), member 3
20524	chr15	Slc25a17		10.7	oocyte	0.62	solute carrier family 25 (mitochondrial carrier, peroxisomal membrane protein), member 17
71803	chr06	Slc25a18		56.9	preoptic	17.03	solute carrier family 25 (mitochondrial carrier), member 18
246696	chr19	Slc25a28		2.3	pituitary	1.01	solute carrier family 25, member 28
67712	chr14	Slc25a37		38.7	bonemarrow	0.73	solute carrier family 25, member 37
20525	chr04	Slc2a1		69.6	placenta	3.05	solute carrier family 2 (facilitated glucose transporter), member 1
22785	chr02	Slc30a4		5.1	mammary gland (lact)	1.26	solute carrier family 30 (zinc transporter), member 4
110172	chr11	Slc35b1		4.8	fertilized egg	0.87	solute carrier family 35, member B1
108652	chr13	Slc35b3		7.1	oocyte	0.7	solute carrier family 35, member B3
215335	chr11	Slc36a1		17.9	dorsal root ganglia	4.57	solute carrier family 36 (proton/amino acid symporter), member 1
105727	chr15	Slc38a1		3.7	placenta	0.86	solute carrier family 38, member 1
76257	chr09	Slc38a3	*				solute carrier family 38, member 3
227059	chr01	Slc39a10		9.3	amygdala	5.22	solute carrier family 39 (zinc transporter), member 10
100434	chr04	Slc44a1		15.3	spinal cord lower	1.48	solute carrier family 44, member 1
70129	chr17	Slc44a4		47.9	large intestine	0.94	solute carrier family 44, member 4
242259	chr03	Slc44a5	*	1.6	skeletal muscle	0.97	solute carrier family 44, member 5
212980	chr01	Slc45a3		84.3	oocyte	0.74	solute carrier family 45, member 3
54403	chr05	Slc4a4	*	5	kidney	1.31	solute carrier family 4 (anion exchanger), member 4
232333	chr06	Slc6a1	*	192.5	cerebellum	115.6	solute carrier family 6 (neurotransmitter transporter, GABA), member 1
15567	chr11	Slc6a4	*	13.1	small intestine	0.96	solute carrier family 6 (neurotransmitter transporter, serotonin), member 4
104245	chr07	Slc6a5	*	91.8	spinal cord lower	0.93	solute carrier family 6 (neurotransmitter transporter, glycine), member 5
20539	chr08	Slc7a5		10.4	salivary gland	1.13	solute carrier family 7 (cationic amino acid transporter, y+ system), member 5
30962	chr07	Slc7a9		65.6	small intestine	0.94	solute carrier family 7 (cationic amino acid transporter, y+ system), member 9
20541	chr17	Slc8a1		3.2	olfactory bulb	1.25	solute carrier family 8 (sodium/calcium exchanger), member 1
105243	chr13	Slc9a3	*	86.6	large intestine	0.96	solute carrier family 9 (sodium/hydrogen exchanger), member 3
26941	chr11	Slc9a3r1		17.2	small intestine	0.94	solute carrier family 9 (sodium/hydrogen exchanger), isoform 3 regulator 1
65962	chr17	Slc9a3r2		9.4	lung	0.93	solute carrier family 9 (sodium/hydrogen exchanger), isoform 3 regulator 2
67854	chr01	Slco6b1		18.5	testis	1.11	solute carrier organic anion transporter family, member 6b1
237887	chr11	Slfn10					schlafen 10
276950	chr11	Slfn8					schlafen 8
237886	chr11	Slfn9		2	brown fat	0.96	schlafen 9
20568	chr02	Slpi		103	trachea	0.97	secretory leukocyte peptidase inhibitor
17126	chr18	Smad2		14	fertilized egg	0.94	MAD homolog 2 (Drosophila)
83797	chr15	Smarcd1		12.9	olfactory bulb	5.52	SWI/SNF related, matrix associated, actin dependent regulator of chromatin, subfamily d, member 1
20597	chr07	Smpd1		3.3	snout epidermis	1.8	sphingomyelin phosphodiesterase 1, acid lysosomal
58994	chr08	Smpd3	*	16.2	dorsal striatum	8.28	sphingomyelin phosphodiesterase 3, neutral
71726	chr15	Smug1		1.3	pituitary	1	single-strand selective monofunctional uracil DNA glycosylase
75788	chr05	Smurf1		8.8	fertilized egg	1.37	SMAD specific E3 ubiquitin protein ligase 1
66313	chr11	Smurf2					SMAD specific E3 ubiquitin protein ligase 2
20648	chr02	Snta1		14.2	skeletal muscle	0.99	syntrophin, acidic 1
84704	chr07	Snurf					SNRPN upstream reading frame
20411	chr19	Sorbs1		10.7	adipose tissue	0.96	sorbin and SH3 domain containing 1
234214	chr08	Sorbs2		15.6	vomeralnasal organ	5.22	sorbin and SH3 domain containing 2
20410	chr14	Sorbs3	*	2.7	lung	0.93	sorbin and SH3 domain containing 3
20665	chr15	Sox10		3.8	spinal cord lower	0.93	SRY-box containing gene 10
20680	chr14	Sox7	*	39.2	lung	0.87	SRY-box containing gene 7
20681	chr17	Sox8	*	1.8	dorsal striatum	1.62	SRY-box containing gene 8
20682	chr11	Sox9	*	10.7	snout epidermis	1.67	SRY-box containing gene 9
217116	chr11	Spata20		405.6	testis	0.98	spermatogenesis associated 20
75571	chr13	Spata9		79.8	testis	0.95	spermatogenesis associated 9
30051	chr17	Spdef		68.5	prostate	1.12	SAM pointed domain containing ets transcription factor
66712	chr09	Spesp1		5.6	testis	0.96	sperm equatorial segment protein 1
27965	chr09	Spg21		6.6	adipose tissue	0.82	spastic paraplegia 21 homolog (human)
68166	chr18	Spire1		11.2	oocyte	2.6	spire homolog 1 (Drosophila)
234857	chr08	Spire2		6	dorsal root ganglia	1.14	spire homolog 2 (Drosophila)
101809	chr07	Spred3		8	preoptic	2.16	sprouty-related, EVH1 domain containing 3
94060	chr03	Sprrl1		713.2	tongue	0.97	small proline rich-like 1
24066	chr18	Spry4		24.1	oocyte	0.97	sprouty homolog 4 (Drosophila)
74646	chr04	Spsb1	*	61.8	umbilical cord	1.03	splA/ryanodine receptor domain and SOCS box containing 1
79401	chr13	Spz1		988.9	testis	0.98	spermatogenic Zip 1
20775	chr15	Sqle		1.8	spleen	0.97	squalene epoxidase
20807	chr17	Srf	*	4.5	bladder	2.28	serum response factor
259302	chr06	Srgap3		8.7	olfactory bulb	4.17	SLIT-ROBO Rho GTPase activating protein 3
66970	chr13	Ssbp2		28.2	thymus	2.09	single-stranded DNA binding protein 2
76900	chr08	Ssbp4		3.7	preoptic	3.13	single stranded DNA binding protein 4
237860	chr11	Ssh2		7.5	testis	0.93	slingshot homolog 2 (Drosophila)
20604	chr16	Sst		119	stomach	75.42	somatostatin
[truncated: 246 more rows]
